1 **Viral satellites exploit phage proteins to escape degradation of the bacterial host**  
2 **chromosome**

3

4 Amelia C. McKitterick<sup>1</sup>, Stephanie G. Hays<sup>1</sup>, Munirul Alam<sup>2</sup>, and Kimberley D. Seed<sup>1,3,\*</sup>

5

6 <sup>1</sup>Department of Plant and Microbial Biology, University of California, Berkeley, 271 Koshland

7 Hall, Berkeley, CA 94720, USA

8 <sup>2</sup>icddr,b, formerly known as International Centre for Diarrhoeal Disease Research,

9 Bangladesh, Dhaka, Bangladesh

10 <sup>3</sup>Chan Zuckerberg Biohub, San Francisco, CA 94158, USA

11 \*Correspondance: kseed@berkeley.edu

12

13

14 Key words: phage, mobile genetic element, defense, replication, parasitism, satellite, helicase

15

16

17 **Summary**

18 Phage defense systems are often found on mobile genetic elements (MGEs), where they  
19 constitutively defend against invaders or are induced to respond to new assaults. Some MGEs,  
20 the phage satellites, exploit phages for their own transmission after induction, reducing phage  
21 production and protecting their hosts in the process. One such satellite in *Vibrio cholerae*, PLE,  
22 is triggered by the lytic phage ICP1 to excise from the chromosome, replicate, and transduce to  
23 neighboring cells, completely sabotaging phage production. Here, we found that ICP1 has  
24 evolved to possess one of two syntenic loci encoding an SF1B-type helicase, either of which  
25 PLE can exploit to directly drive PLE replication. Further, loss of PLE mobilization limits anti-  
26 phage activity due to phage-mediated degradation of the bacterial genome. Our work provides  
27 insight into the unique challenges imposed on the parasites of lytic phages and underscores the  
28 adaptations of these satellites to their ever-evolving target phage.

29

## 30 Introduction

31 Viruses and mobile genetic elements (MGEs) are associated with organisms from all  
32 branches of the tree of life (Koonin & Krupovic 2015). In order to successfully infect their hosts,  
33 viruses employ a variety of host-takeover programs that inhibit host activities while promoting  
34 viral processes. Bacteriophages, or phages, are viruses that infect bacterial hosts and have  
35 profound effects on bacterial fitness, as well as on human health and disease (Brüssow et al.  
36 2004; Bondy-Denomy & Davidson 2014). Of interest, lytic phages, which infect and kill their  
37 bacterial hosts within a single round of infection, have recently come to light as having impactful  
38 roles in shaping the composition of bacterial populations, such as the human gut microbiome  
39 (Manrique et al. 2017), and as potential biocontrol agents for antibiotic resistant infections (Pires  
40 et al. 2016). Lytic phages are particularly insidious to their bacterial hosts—upon infection,  
41 phages like the lytic *Escherichia coli* phage T4 can express a variety of genes that mediate  
42 host-cell takeover programs. T4 expresses genes that shut down and redirect host  
43 transcriptional machinery to favor transcription of phage genes, as well as nucleases that  
44 degrade the host chromosome to inhibit host gene expression as well as free up nucleosides  
45 that are then incorporated into the rapidly replicating phage genome (Hinton et al. 2005; Warner  
46 et al. 1970; Hercules et al. 1971).

47 Paradoxically, phages also contribute to bacterial population diversity and complexity by  
48 facilitating horizontal gene transfer (HGT) (Brüssow et al. 2004; Koskella & Brockhurst 2014). In  
49 addition to the well characterized mechanisms by which phages can spread bacterial genetic  
50 material to neighboring cells, such as generalized and specialized transduction (Penadés et al.  
51 2015), recent work has uncovered a means for large regions of the bacterial chromosome to be  
52 packaged into temperate phage virions in a process termed lateral transduction (Chen et al.  
53 2018). Independent of packaging, phages can also facilitate the spread of bacterial plasmid  
54 DNA from lysed cells to neighbors, increasing the range of genetic material that can be shared  
55 within a population (Keen et al. 2017). In sharp contrast to these forms of “passive” phage-

56 mediated HGT, there are parasitic mobile genetic elements referred to as phage satellites, such  
57 as phage inducible chromosomal islands (PICIs), that have evolved to explicitly manipulate the  
58 phage replication and packaging programs for their own horizontal spread (Penadés & Christie  
59 2015).

60 Typically, phage defense in bacteria is attributable to widely characterized systems,  
61 including restriction-modification and CRISPR-Cas systems that inhibit phage through targeted  
62 cleavage of the infecting phage genome, and toxin/antitoxin systems and abortive infection  
63 systems that function through killing of the infected host cell (Samson et al. 2013; Dy et al.  
64 2014; Hille et al. 2018). However, phage parasites, which are being increasingly discovered  
65 (O'Hara et al. 2017; Martínez-Rubio et al. 2017; Fillol-Salom et al. 2018), can also provide  
66 robust phage defense for their bacterial hosts. One type of PICI, the well characterized  
67 *Staphylococcus aureus* pathogenicity islands (SaPIs), are induced by infection with a helper  
68 phage, compete with that helper over the bacterial host's replication machinery, and steal phage  
69 packaging proteins to selfishly package the SaPI genome for horizontal transfer. This parasitic  
70 interference negatively impacts the ability of the helper phage to complete its lifecycle, thus  
71 blocking plaque formation (Ubeda et al. 2009; Tormo-Más et al. 2010; Ram et al. 2012). Despite  
72 diverse mechanisms, phage defense systems must overcome phage-mediated host takeover  
73 and go on to prevent rampant phage propagation through the bacterial community. Genomic  
74 analyses to localize anti-phage mechanisms in bacterial genomes have revealed that they tend  
75 to cluster together on what are referred to as defense islands (DIs) (Makarova et al. 2011).  
76 Analysis of DIs has even led to the discovery of new phage defense systems solely due to the  
77 prevalent clustering of these defense systems on MGEs (Doron et al. 2018). While  
78 hypothesized to have roles in HGT, the prevalence of phage defense systems on genomic  
79 islands has yet to be explained. Likewise, it remains to be seen the extent to which such DIs  
80 have evolved to parasitize phages for their own dissemination.

81           *Vibrio cholerae*, the etiological agent of the diarrheal disease cholera, is constantly under  
82 assault by phages both in aquatic environments as well as in human hosts (Faruque et al. 2005;  
83 Seed et al. 2011; Seed et al. 2014). The dominant phage that preys on epidemic *V. cholerae* is  
84 ICP1, a lytic myovirus that is consistently isolated from cholera patient stool samples in regions  
85 where cholera is endemic, such as Dhaka, Bangladesh (Seed et al. 2011; Angermeyer et al.  
86 2018; McKitterick et al. 2019). In response to the consistent attack by ICP1, *V. cholerae* has  
87 acquired the phage-inducible chromosomal island-like element (PLE), a highly specific phage  
88 satellite that blocks plaque formation by ICP1 while exploiting phage resources to further its  
89 lifecycle (O'Hara et al. 2017). PLE excises from the host chromosome during ICP1 infection,  
90 replicates to high copy, and is specifically transduced to neighboring cells; concurrently, PLE  
91 replication within the host cell negatively impacts the ability of ICP1 to replicate its genome,  
92 contributing to the inhibition of ICP1 production (Barth et al. 2019). PLE encodes a large serine  
93 recombinase, Int, that catalyzes the PLE excision and circularization reaction by physically  
94 interacting with ICP1-encoded PexA, a small protein of unknown function that is specific to ICP1  
95 and is hijacked by PLE to act as a recombination directionality factor (McKitterick & Seed 2018).  
96 Once excised, PLE begins to replicate and then is thought to steal structural proteins from ICP1  
97 to facilitate its own transmission. Once packaged, PLE triggers accelerated lysis of the infected  
98 culture allowing for release of PLE transducing particles from the infected cells, ultimately killing  
99 the infected *V. cholerae* host but protecting the population as no infectious ICP1 progeny are  
100 produced (O'Hara et al. 2017). Five PLEs have been identified in epidemic *V. cholerae* isolates  
101 and all block plaque formation by ICP1. In addition to inhibiting ICP1, PLEs are also  
102 characterized by conserved genomic architecture and the aforementioned PLE lifecycle during  
103 ICP1 infection (O'Hara et al. 2017).

104           Recent work has uncovered a PLE-encoded factor that is necessary for PLE replication:  
105 the replication initiation factor, *repA* (Barth et al. 2019). Expression of *repA* is induced by ICP1  
106 infection (unpublished), facilitating origin binding and recruitment of replisome proteins that have

107 yet to be identified. In the absence of ICP1 infection, however, RepA is not sufficient to drive  
108 PLE replication (Barth et al. 2019), further, PLE is not predicted to encode replication  
109 machinery, suggesting that other phage-encoded gene products are required for PLE  
110 amplification. As all PLEs replicate following ICP1 infection (O'Hara et al. 2017), it stands to  
111 reason that the PLE has evolved to exploit conserved components of ICP1's replication  
112 machinery. Similar to PLE excision (O'Hara et al. 2017), PLE replication is essential for  
113 horizontal transmission of PLE transducing units, thus further underscoring the role of ICP1 in  
114 driving PLE HGT; however, the relatively low rate of transduction suggests that robust PLE  
115 replication may have other roles in the PLE conflict with ICP1 (Barth et al. 2019).

116 In order to exploit ICP1, PLE must escape from ICP1-mediated host takeover during  
117 infection. While the precise mechanisms that ICP1 uses to overcome *V. cholerae* have not been  
118 characterized, ICP1 is able to rapidly begin replicating its genome following infection (Barth et  
119 al. 2019) and produces about 100 virions within 20 minutes of infection (O'Hara et al. 2017).  
120 Here, we identify ICP1  $\Delta pexA$  mutants that escape PLE by acquiring mutations in the ICP1-  
121 encoded SF1B accessory helicase that we have named *helA*. We show that while this helicase  
122 is not necessary for ICP1 replication, it is essential for PLE to hijack to drive its own replication  
123 during ICP1 infection. We show that the excision- and replication-deficient PLE is susceptible to  
124 ICP1-mediated host takeover, whereby PLE is degraded while it remains integrated in the *V.*  
125 *cholerae* chromosome. Analysis of natural isolates of ICP1 from cholera patient stool samples in  
126 the megacity of Dhaka compared to a rural site in Bangladesh revealed an alternative SF1B  
127 helicase allele in phages shed from the rural site. Functional comparisons between the two  
128 alleles revealed that both alleles, though unrelated, can be hijacked by all PLEs to facilitate PLE  
129 replication. Though neither helicase is essential for ICP1, ICP1 faces impaired fitness in the  
130 absence of either accessory helicase, explaining their prevalence in ICP1 and other *Vibrio*  
131 phages. PLE's capacity to use a variety of phage-encoded helicases to drive PLE replication  
132 underscores the critical role that replication plays in the PLE lifecycle to avoid phage-mediated

133 host takeover and to facilitate continued gene expression. The common trend of phage defense  
134 islands clustering on MGEs suggests that mobilization of these phage defense islands, such as  
135 PLE, is a common mechanism to escape phage mediated host takeover.

136

## 137 **Results**

### 138 **ICP1 is able to escape excision deficient PLE by acquiring mutations in the predicted**

#### 139 **helicase *heIA***

140 Previous work has demonstrated the role for phage-encoded *pexA* in directing PLE 1  
141 excision during infection with an ICP1 isolate from 2006, referred to as ICP1<sup>A</sup> (McKitterick &  
142 Seed 2018) (Figure 1A). PLE 1 mediated inhibition of ICP1 does not require PLE 1 excision, so  
143 ICP1  $\Delta pexA$  is still blocked by PLE 1 (Figure 1B); however, ICP1<sup>A</sup>  $\Delta pexA$  is able to form rare  
144 plaques on *V. cholerae* harboring PLE 1 at a frequency of about 1 per 10<sup>6</sup> phage (Figures 1A  
145 and 1C). Due to the low efficiency of plaquing, we consider these phage to be “escape phage”  
146 that have acquired a mutation in the genome allowing them to overcome PLE 1. To identify the  
147 phage gene(s) that harbor mutations enabling escape, we collected and purified three escape  
148 phage and performed whole genome sequencing. Analysis of these genomes revealed that all  
149 escape phage had acquired mutations in ICP1<sup>A</sup> *gp147*, a predicted SF1B-type helicase which  
150 we have since named *helicase A* (*heIA*) (Table S1).

151 SF1B-type helicases are found broadly across all domains of life and include the well-  
152 studied *pif1* and *recD* (Saikrishnan et al. 2009). In eukaryotes such as *Saccharomyces*  
153 *cerevisiae*, *pif1* has been implicated in telomere maintenance, Okazaki fragment processing,  
154 and resolution of G-quadruplex motifs (Byrd & Raney 2017), while *recD* is a core component of  
155 the *E. coli* RecBCD complex involved in DNA processing and repair (Singleton et al. 2004).  
156 Another prototypical SF1B-type helicase is *dda*, encoded by phage T4, which is a non-essential  
157 accessory helicase implicated in origin melting, translocating proteins off DNA, and a wide

158 variety of other functions *in vitro*, although its exact role *in vivo* is unknown (He et al. 2012; Byrd  
159 & Raney 2006; Brister 2008).

160 To validate the role of *helA* in ICP1<sup>A</sup> escape from PLE 1, we constructed a *helA* deletion  
161 in a wild-type ICP1<sup>A</sup> background and probed the mutant phage for the ability to overcome PLE  
162 1. ICP1<sup>A</sup>-encoded *helA* is not necessary for plaque formation on PLE (-) *V. cholerae*, and ICP1<sup>A</sup>  
163  $\Delta$ *helA* is still blocked by PLE 1, indicating that *helA* is not necessary for PLE 1 induction (Figure  
164 1B). Similar to ICP1<sup>A</sup>  $\Delta$ *pexA*, the absence of *helA* gives ICP1<sup>A</sup> an advantage on PLE (+) *V.*  
165 *cholerae*, allowing for rare plaques to form; however, ICP1<sup>A</sup>  $\Delta$ *helA* forms plaques at a frequency  
166 two orders of magnitude higher than ICP1<sup>A</sup>  $\Delta$ *pexA* on PLE 1 (Figure 1C). Conversely, the  
167 double mutant ICP1<sup>A</sup>  $\Delta$ *pexA*  $\Delta$ *helA* is able to form small plaques on PLE 1 at a relatively high  
168 efficiency (Figures 1B and 1C). ICP1<sup>A</sup>  $\Delta$ *pexA*  $\Delta$ *helA* plaques that form on PLE (+) *V. cholerae*  
169 were picked and the plaquing efficiency was re-tested to determine if those phage were  
170 subsequently able to escape PLE 1 at a higher rate (Figure S1). As these progeny phage re-  
171 plaqued at the same efficiency as ICP1<sup>A</sup>  $\Delta$ *pexA*  $\Delta$ *helA*, we conclude that they are not genetic  
172 escape phage but instead are able to overcome some aspects of PLE 1 activity through the loss  
173 of both ICP1<sup>A</sup>-encoded *pexA* and *helA*.

174 We next wanted to characterize the role of *helA* for ICP1<sup>A</sup> function. HelA is detectable in  
175 infected cells via Western blot within eight minutes of ICP1<sup>A</sup> infection (Figure 1D), which is  
176 consistent with the onset of ICP1<sup>A</sup> replication initiation (Barth et al. 2019), suggesting that *helA*  
177 may have a role in ICP1<sup>A</sup> replication. As PLE 1 diminishes the level of ICP1<sup>A</sup> replication (O'Hara  
178 et al. 2017; Barth et al. 2019), we hypothesized that PLE 1 hijacks HelA during infection as a  
179 mechanism to interfere with ICP1<sup>A</sup> replication. To test this hypothesis, we evaluated ICP1<sup>A</sup>  
180  $\Delta$ *helA* replication in the presence and absence of PLE 1 by qPCR. In contrast to plaque  
181 formation, which requires multiple rounds of phage infection and replication to visualize a zone  
182 of killing, qPCR allows for quantification of phage DNA replication in a single round of infection.  
183 Consistent with the ability to form a plaque on PLE (-) *V. cholerae*, there are no deficiencies in



184 ICP1<sup>A</sup>  $\Delta$ *helA* replication relative to a wild-type phage over the course of the 20 minute infection  
185 cycle (Figure 1E), indicating that *helA* is not essential for ICP1<sup>A</sup> replication. Conversely, infection  
186 of a PLE (+) *V. cholerae* host with ICP1<sup>A</sup>  $\Delta$ *helA* rescues ICP1 replication to the level that is  
187 observed in a PLE (-) host (Figure 1E), suggesting that, while not necessary for ICP1<sup>A</sup>, *helA* is  
188 exploited by PLE 1 to interfere with ICP1 during infection. However, because ICP1<sup>A</sup>  $\Delta$ *helA* is not  
189 deficient for replication in the absence PLE 1, the ICP1<sup>A</sup> replication defect in the presence of  
190 PLE 1 is not likely directly due to PLE 1-mediated hijacking of HelA activity.

191

### 192 **ICP1-encoded *helA* is necessary for PLE replication**

193 ICP1 and PLE 1 replication appear to be inversely related, wherein ICP1 copy number is  
194 restored when PLE 1 replication is abolished via deletion of either the PLE 1 origin of replication  
195 or *repA* (Barth et al. 2019). Therefore, the observed restoration in ICP1<sup>A</sup>  $\Delta$ *helA* copy number  
196 during infection of a PLE (+) host implicates phage-encoded HelA in promoting PLE 1  
197 replication. To test the role of *helA* in PLE replication, we infected PLE (+) *V. cholerae* with  
198 ICP1<sup>A</sup>  $\Delta$ *helA* and monitored the change in PLE 1 copy over the course of infection. While PLE 1  
199 is able to replicate to high copy when infected with a wild-type phage, strikingly, PLE 1 is unable  
200 to replicate in the absence of *helA* (Figure 2A). This phenotype can be complemented by  
201 ectopic expression of *helA* during ICP1<sup>A</sup> infection, demonstrating that *helA* is necessary for PLE  
202 1 replication.

203 SF1B-type helicases are implicated in activities ranging from replication and genome  
204 maintenance to transcriptional regulation (Byrd & Raney 2017). Additionally, the *S. aureus*  
205 phage parasites, SaPIs, make use of dUTPases as anti-repressors to initiate the transcriptional  
206 program of the island, suggesting that these genomic islands can evolve to respond to phage-  
207 encoded proteins independent of their biological function for the phage (Tormo-Más et al. 2010;  
208 Bowring et al. 2017). As such, we next wanted to determine if *helA* has a direct role in PLE 1  
209 replication or if it is necessary to transcriptionally activate the island to allow for production of

210 PLE 1-encoded proteins, such as *repA*, that are essential for PLE 1 replication. To test the  
211 involvement of *helA* in PLE 1 replication, we made use of a minimal PLE replication system  
212 referred to as the “midiPLE” (Barth et al. 2019). The midiPLE contains only the endogenous  
213 PLE 1 integrase as well as the PLE 1 origin of replication, integrated in the same chromosomal  
214 location as PLE 1 in the *V. cholerae* chromosome. This construct is competent to excise from  
215 the chromosome following *pexA* expression during ICP1<sup>A</sup> infection, but is unable to replicate  
216 without ectopic expression of the PLE 1-encoded replication initiator, *repA*. When *repA* is  
217 provided *in trans*, midiPLE replicates during ICP1<sup>A</sup> infection (Figure 2B). In comparison to  
218 infection with wild-type phage, midiPLE fails to replicate during infection with ICP1<sup>A</sup>  $\Delta$ *helA*. This  
219 phenotype can be complemented by expressing *helA* *in trans*, showing that *helA* is necessary  
220 for PLE 1 replication independent of other PLE 1-encoded genes and supporting the conclusion  
221 that HelA is directly involved in PLE 1 replication. Interestingly, *helA* is not sufficient to stimulate  
222 PLE 1 replication in the absence of ICP1<sup>A</sup> infection (Figure 2B), indicating that other phage, or  
223 possibly *V. cholerae*, components are additionally required to facilitate PLE 1 replication.

224

### 225 **PLE replication contributes to anti-phage gene dosage**

226 In the course of replication sampling during ICP1<sup>A</sup> infection, we observed a defect in  
227 PLE 1-mediated accelerated lysis that correlates with a loss in PLE 1 replication. A culture of  
228 PLE (+) *V. cholerae* infected with ICP1 typically lyses 20 minutes after infection, while an  
229 infected PLE (-) culture takes upwards of 90 minutes to lyse (O’Hara et al. 2017). However, we  
230 observed that cultures infected with ICP1<sup>A</sup>  $\Delta$ *helA* consistently had delays in lysis, suggesting  
231 impaired PLE 1 activity, and ectopic expression of *helA* led to intermediate lysis phenotypes  
232 (Figure S2A). Though the basis for PLE 1-mediated accelerated lysis is not yet known, we  
233 reasoned that robust PLE 1 replication enhances expression of PLE 1-encoded genes merely  
234 through increasing the template copy number. To test this hypothesis, we created a  
235 nanoluciferase transcriptional reporter cloned downstream of PLE 1 *orf2* ( $P_{orf2}$ *nanoluc*, Figure

236 S2B) to quantify defects in PLE 1 transcription when PLE 1 is unable to replicate. Relative to  
237 infection with wild-type ICP1<sup>A</sup>,  $P_{orf2}$ *nanoluc* produced 0.16 times as much luminescence during  
238 infection with ICP1<sup>A</sup>  $\Delta$ *helA* (Figure 2C). When PLE 1 replication was restored through ectopic  
239 expression of *helA*, the reporter activity resulting from infection with ICP1  $\Delta$ *helA* was restored to  
240 wild-type levels, demonstrating that PLE 1 copy number contributes to the global level of PLE 1  
241 transcription. As such, inhibition of PLE 1 replication leads to phenotypes such as delayed lysis  
242 during ICP1<sup>A</sup> infection and potentially contributes to the ability of ICP1<sup>A</sup>  $\Delta$ *helA* to escape PLE 1.  
243

#### 244 **ICP1 overcomes replication and excision deficient PLE through degradation of the *V.*** 245 ***cholerae* chromosome**

246 As ICP1-encoded *pexA* is necessary for PLE 1 excision (McKitterick & Seed 2018) and  
247 *helA* is necessary for PLE 1 replication during ICP1 infection (Figure 2A), we next wanted to  
248 understand how ICP1<sup>A</sup>  $\Delta$ *pexA*  $\Delta$ *helA* is able to overcome PLE 1 (Figure 1B). Even when PLE 1  
249 is challenged by ICP1<sup>A</sup>  $\Delta$ *helA* and is unable to replicate leading to transcriptional deficiencies,  
250 PLE 1 is still able to excise from the *V. cholerae* chromosome and is more inhibitory than when  
251 it is maintained in the chromosome, leading us to speculate that the position of PLE 1 in the cell,  
252 either intra- or extrachromosomal, is important for its activity. Phages are known to encode  
253 nucleases that attack the bacterial chromosome, freeing up nucleosides that can then be  
254 incorporated into newly synthesized phage genomes (Warner et al. 1970). Additionally, deep  
255 sequencing of the total DNA in ICP1 infected *V. cholerae* cells shows that the proportion of  
256 reads mapping to the *V. cholerae* chromosomes decreases over the course of infection (Barth  
257 et al. 2019). This observation led us to hypothesize that nucleolytic activity encoded by ICP1<sup>A</sup>,  
258 deployed to degrade the *V. cholerae* chromosome during infection, is able to degrade PLE 1  
259 when PLE 1 is stuck in the chromosome unable to replicate, allowing for ICP1<sup>A</sup> to form some  
260 small plaques on PLE (+) *V. cholerae*. To test this hypothesis, we made use of a minimal PLE  
261 excision system, the miniPLE, that has the PLE 1-encoded integrase but lacks an origin of

262 replication (Figure 3A). Thus during infection, the miniPLE excises from the host chromosome  
263 and circularizes, but does not replicate (McKitterick & Seed 2018). To simulate an excision-  
264 deficient miniPLE, we created miniPLE<sub>CD</sub>, which possesses a point mutation in the catalytic  
265 serine residue in the miniPLE-encoded integrase, making the integrase catalytically dead and  
266 rendering the construct unable to excise from the chromosome (Figure 3B).

267 Total DNA from ICP1<sup>A</sup> miniPLE and miniPLE<sub>CD</sub> infected cells was digested, run on an  
268 agarose gel, and the stability of the miniPLE was observed via Southern blot (Figure 3C).  
269 During the course of ICP1<sup>A</sup> infection, the miniPLE successfully excises from the *V. cholerae*  
270 chromosome and is maintained as an episome. Conversely, the amount of miniPLE<sub>CD</sub>, which is  
271 unable to excise from the chromosome, decreases by 20 minutes following ICP1<sup>A</sup> infection  
272 (Figure 3C, bottom), relative to the amount of total DNA prepped from the cells (Figure 3C, top),  
273 suggesting that the copy number of miniPLE<sub>CD</sub> decreases as a result of ICP1<sup>A</sup> infection.  
274 Quantification of miniPLE via qPCR further demonstrates that the excision-competent miniPLE  
275 is maintained as a stable episome with no change in copy number during ICP1<sup>A</sup> infection  
276 (Figure 3D). In comparison, the miniPLE<sub>CD</sub> that is unable to escape the *V. cholerae* host  
277 chromosome decreased in copy number during infection with ICP1<sup>A</sup>, indicating that it is  
278 susceptible to ICP1<sup>A</sup>-mediated chromosomal degradation. Thus, not only is PLE mobilization  
279 important for HGT (O'Hara et al. 2017; Barth et al. 2019), but it is also essential for PLE escape  
280 from ICP1 takeover of the *V. cholerae* host.

281

## 282 **Diverse SF1B helicases are maintained in ICP1 and contribute to ICP1 fitness**

283 Due to the importance of PLE replication in PLE gene dosage and avoiding ICP1-  
284 mediated host takeover, we next hypothesized that ICP1 would evolve to abolish PLE  
285 replication by accumulating mutations in the *heIA* allele, indicative of co-evolution between the  
286 two entities. To identify signatures of co-evolution, we examined HeIA from sequenced isolates  
287 of ICP1 that had been recovered from epidemic sampling in Dhaka, Bangladesh. HeIA from

288 ICP1 isolated from epidemic sampling from 2001 to 2017 is over 99% identical at the amino acid  
289 level indicating that there is either little pressure for HelA to evolve over time, or that HelA  
290 mutations cannot be tolerated in nature (Table S6). Though there is no change in the ability of  
291 ICP1 to replicate in a single round of infection in the absence of *helA* (Figure 1E), ICP1<sup>A</sup>  $\Delta$ *helA*  
292 forms plaques that are on average 0.75 times smaller than wild-type phage plaques (Figure 4A).  
293 This size defect indicates that mutant phage are less fit in the absence of *helA* and supports the  
294 notion that functional *helA* must be maintained by ICP1 in nature.

295         Despite having a high degree of conservation, *helA* is not considered part of the core  
296 ICP1 genome (Angermeyer et al. 2018): two phage isolates recovered from cholera patient stool  
297 samples from Dhaka in 2006 do not encode *helA*, but instead have an alternative SF1B-type  
298 helicase in the same locus, which we call *helicase B* (*helB*) (Figure 4B). HelB is 24% identical to  
299 HelA, with a conserved P-loop ATPase domain, but HelB has an extended C-terminus that  
300 contains a domain of unknown function, DUF2493 (Figure S3A). In addition to having low  
301 sequence identity, *helA* and *helB* are flanked by different, unrelated genes each encoding  
302 products with no predicted structure or function (Figure 4B), suggesting that while ICP1 is  
303 unable to lose *helA* in nature in an attempt to avoid hijacking by PLE for replication, ICP1 may  
304 swap *helA* for a distinct accessory helicase.

305         We then performed a BLASTP search of the National Center for Biotechnology  
306 Information's nonredundant protein sequence database to identify the origin of *helA* and *helB*.  
307 Homologs of HelA are commonly found in phages of marine bacteria, and, particularly, in a  
308 group of related myoviruses that infect non-cholera *Vibrios* (Figure S3B). Of note, two of the  
309 *Vibrio* phages were also predicted to encode a homolog of one of the proteins flanking HelA in  
310 ICP1<sup>A</sup>, indicating that the *helA* locus could have been shared with a common ancestor of these  
311 phages. Conversely, HelB is more divergent, with the only identifiable homolog found in a  
312 *Pseudoalteromonas* phage that is also predicted to have the same DUF2493 C-terminus. These  
313 HelB proteins cluster on a more distant branch than the HelA homologs (Figure S3B),

314 supporting the hypothesis that *helB* was horizontally acquired by ICP1. Altogether, SF1B  
315 helicases are readily found in marine phages, and ICP1 encoding *helA* are the dominant ICP1  
316 shed by cholera patients in Dhaka between 2001-2017.

317 Most epidemic sampling of ICP1 from cholera patients has been done in the urban  
318 cholera endemic site in Dhaka; however, we recently began sampling cholera patients at a rural  
319 and estuarine site in Mathbaria, Bangladesh. In contrast to what was observed in ICP1 isolates  
320 from Dhaka in the 2017 epidemic period, all the ICP1 isolates recovered from cholera patients in  
321 Mathbaria encoded the *helB* allele (Figure 4C). One representative isolate from Mathbaria from  
322 2017, referred to here as ICP1<sup>B</sup>, is over 99.8% identical to ICP1<sup>A</sup> across 90% of the genome,  
323 with 205 of 227 ICP1<sup>B</sup> predicted open reading frames being shared with ICP1<sup>A</sup>. The resurgence  
324 and dominance of *helB* in the Mathbaria epidemic sampling suggests that there could be a  
325 selective advantage for ICP1 encoding *helB* rather than *helA* in this region.

326 As ICP1<sup>B</sup> is not isogenic to ICP1<sup>A</sup>, we first wanted to characterize the role of *helB* in  
327 ICP1<sup>B</sup> fitness. Similar to *HelA*, *HelB* is detectable by Western blot within 8 minutes of infection  
328 (Figure 5A), again coinciding with ICP1 replication (Barth et al. 2019). Also similar to *helA*, *helB*  
329 is not essential for ICP1<sup>B</sup>, and ICP1<sup>B</sup>  $\Delta$ *helB* is able to form plaques in the absence and presence  
330 of PLE 1 (Figure 5B). Interestingly, ICP1<sup>B</sup>  $\Delta$ *helB* forms plaques on PLE (+) *V. cholerae* with a  
331 higher efficiency than ICP1<sup>A</sup>  $\Delta$ *helA*, suggesting that ICP1<sup>B</sup> has evolved other ways to limit PLE-  
332 mediated anti-phage activity.

333 We next wanted to see if ICP1<sup>B</sup> replication was impacted by the *helB* deletion. In  
334 contrast to  $\Delta$ *helA* in ICP1<sup>A</sup>, ICP1<sup>B</sup>  $\Delta$ *helB* is significantly impaired for replication during the  
335 course of infection compared to wild-type ICP1<sup>B</sup> (Figure 5C), indicating that although *helB* is not  
336 necessary for ICP1<sup>B</sup> replication, it does have a more central role in phage fitness. Consistent  
337 with the observation that PLE 1 decreases the ability of ICP1<sup>A</sup> to replicate (Figure 1E),  
338 replication of ICP1<sup>B</sup>, too, is impacted negatively by PLE 1; however, ICP1<sup>B</sup>  $\Delta$ *helB* does not  
339 restore the ability of ICP1<sup>B</sup> to replicate in the presence of PLE 1 (Figure 5C), demonstrating a

340 more severe fitness effect associated with losing the accessory helicase on ICP1<sup>B</sup> than on  
341 ICP1<sup>A</sup> independent of the presence of PLE 1.

342 To confirm the role of *helB* in diminished ICP1<sup>B</sup> fitness, we next ectopically expressed  
343 *helB* to complement the mutant phage. However, we could not complement the replication  
344 defect for ICP1<sup>B</sup>  $\Delta$ *helB* by ectopic expression of *helB*, suggesting that the observed decrease in  
345 ICP1 fitness may not be due to direct loss of the *helB* gene product (Figure 5D). To minimize  
346 potential polar effects of  $\Delta$ *helB*, a targeted mutation was made to remove 25 amino acids  
347 encompassing the helicase domain (HD) that contains the Walker A motif necessary for ATP  
348 hydrolysis (Blair et al. 2009). While ICP1<sup>B</sup> *helB*  $\Delta$ HD had increased phage replication relative to  
349 the clean *helB* deletion, there was still a defect in replication that could not be complemented  
350 (Figure 5D), suggesting that ectopic expression may not be able to achieve the appropriate  
351 timing or dosage of *helB* expression, or that the fitness cost is not a result of loss of HelB *per se*.  
352 Due to the complex nature of phage genomes and tight regulation of phage gene expression,  
353 disruption of even the HD domain of *helB* could have detrimental effects on uncharacterized *in*  
354 *cis* sites that could contribute to poor fitness. The fitness defect associated with mutant *helB*  
355 was also observed as a decrease in plaque size, with both ICP1<sup>B</sup>  $\Delta$ *helB* and ICP1<sup>B</sup> *helB*  $\Delta$ HD  
356 forming plaques that are, on average, less than 0.66 times the size of ICP1<sup>B</sup> (Figure 5E).  
357 Altogether, ICP1<sup>B</sup> is less fit in the absence of *helB*, consistent with the observation that all  
358 natural ICP1 isolates encode one of two SF1B-type helicases, either *helA* or *helB*.

359

### 360 **PLE exploits phage-encoded distinct SF1B-type helicases to drive replication during** 361 **ICP1 infection**

362 Given that PLE 1 replication requires *helA* (Figure 2A), and ICP1 with *helB* are dominant  
363 in *Mathbaria*, we were tempted by the possibility that phage with *helB* could be selected for as a  
364 mechanism to impede PLE 1 replication during infection. Hence, we next assessed if *helB* could  
365 also support PLE 1 replication. Consistent with the inverse relationship between ICP1 and PLE

366 1 replication, PLE 1 still replicated when infected with ICP1<sup>B</sup>, and as with  $\Delta heIA$ , PLE 1  
367 replication was not observed in the absence *heIB* (Figure 6A), indicating that *heIB* is also  
368 necessary for PLE 1 replication despite HelB having less than shared 25% shared amino acid  
369 identity with HeIA (Figure S3A). Further, ectopic expression of *heIB* complemented the defect in  
370 PLE 1 replication observed during infection with ICP1<sup>B</sup>  $\Delta heIB$ , and ectopic expression of *heIA*  
371 was likewise sufficient to restore PLE 1 replication during infection with ICP1<sup>B</sup>  $\Delta heIB$  (Figure  
372 6A). These data demonstrate that PLE 1 is able to harness either ICP1-encoded accessory  
373 helicase independent of the ICP1 isolate that is infecting the host. Additionally, the shared ability  
374 of these non-isogenic ICP1 isolates to drive PLE 1 replication implicates functionally conserved  
375 gene products in ICP1 isolates, in addition to *heIA* and *heIB*, that are required for PLE 1  
376 replication.

377         Similar to *heIA*, we next used ICP1<sup>B</sup>  $\Delta heIB$  to probe for midiPLE replication following  
378 ectopic expression of *repA*. As expected, midiPLE replicated when infected with ICP1<sup>B</sup> but failed  
379 to replicate in the absence of *heIB*, indicating that *heIB* is also directly involved in PLE 1  
380 replication (Figure 6B). Like *heIA*, *heIB* is also not sufficient to stimulate PLE 1 replication in the  
381 absence of ICP1<sup>B</sup>, showing that PLE 1 is still dependent on additional replication machinery  
382 from ICP1<sup>B</sup>. We additionally confirmed that the ability of HelB to hydrolyze ATP is required for  
383 HelB to facilitate PLE 1 replication by testing the ICP1<sup>B</sup> *heIB*  $\Delta HD$  variant, and, as anticipated,  
384 the helicase activity of *heIB* is necessary for PLE 1 replication (Figure 6C).

385         The first ICP1 isolate identified with the *heIB* allele was from Dhaka in 2006 when PLE 2  
386 *V. cholerae* were being shed by cholera patients (O'Hara et al. 2017; McKitterick et al. 2019),  
387 leading us to evaluate if the two helicase alleles have different capacities to facilitate replication  
388 of different PLEs during infection with ICP1. To test this hypothesis, we first infected isogenic *V.*  
389 *cholerae* harboring each of the five characterized PLEs with ICP1<sup>A</sup> and observed that all PLEs  
390 replicated equally well (Figure S4). Next, we determined that *heIA* is necessary for replication of  
391 all five PLEs during ICP1<sup>A</sup> infection and that replication can be complemented with ectopic



392 expression of *helA* (Figure 6D). To evaluate if each PLE can additionally use *helB* to support  
393 replication, we also complemented ICP1<sup>A</sup>  $\Delta$ *helA* with ectopic expression of *helB* and found that  
394 in fact all five PLEs can use either one of the two ICP1-encoded accessory helicases for  
395 replication.

396 As current data supports the model that PLE responds specifically to ICP1 infection  
397 (O'Hara et al. 2017; McKitterick & Seed 2018), we next wanted to determine if PLE's capacity to  
398 exploit either *helA* or *helB* to drive PLE replication is specific to ICP1-encoded proteins or in  
399 general to SF1B-type helicases. To address the specificity of the interaction, we ectopically  
400 expressed the SF1B-type helicase *dda* from *E. coli* phage T4 during infection with either ICP1<sup>A</sup>  
401  $\Delta$ *helA* or ICP1<sup>B</sup>  $\Delta$ *helB*. T4 Dda is only 16% identical to either HelA or HelB and does not group  
402 with the marine phage SF1B-type helicases (Figure S3B). Although PLE 1 cannot replicate  
403 while infected with either of these  $\Delta$ *hel* phage alone (Figures 6A and 6D), expression of *dda*  
404 was sufficient to support PLE 1 replication in the absence of ICP1-encoded accessory helicases  
405 (Figure 6E). Despite the apparent specificity between PLE and ICP1, the ability of PLE to exploit  
406 a variety of phage-encoded accessory helicases reveals flexibility in at least one requirement for  
407 PLE replication, and suggests that swapping of helicase alleles by ICP1 isolates is not a  
408 beneficial strategy to mitigate PLE parasitism.

409

## 410 Discussion

411 In order to defend against viral infection, host resistance mechanisms must have ways  
412 by which they prevent or bypass virus mediated host takeover. Eukaryotic DNA and RNA  
413 viruses broadly use virally encoded ribonucleases to globally degrade host transcripts in the  
414 infected cell, which sabotage their hosts through modulation of transcript and protein levels.  
415 This decrease in transcript abundance leads to a downregulation of innate immune responses,  
416 processes which are detrimental to the host but are ultimately reversable (Crow et al. 2016;  
417 Rivas et al. 2016). Conversely, degradation of the host chromosome is a host takeover process

418 that is unique to phages. Host chromosome degradation has a twofold benefit for the predatory  
419 phages: it cleaves and releases nucleosides that can be incorporated into the rapidly replicating  
420 phage genome, and it can also destroy the template needed for expression of anti-phage genes  
421 encoded by the bacterial host. With the imminent shutdown of the host upon phage infection, it  
422 is not surprising to find that many bacterial defense systems, such as restriction-modification  
423 and some CRISPR-Cas systems, are expressed constitutively. By balancing the ability to  
424 discern between self and non-self, these systems are safely deployed in the absence of  
425 infection. Conversely, more self-destructive defense mechanisms, such as toxin/antitoxin  
426 systems and abortive infection systems cannot be constitutively active due to lethal outcomes  
427 and must be induced upon infection. Thus, for an inducible defense system like PLE, and  
428 perhaps many phage parasites, mobilization to evade host shutdown is critical. When PLE is  
429 unable to replicate or excise from the chromosome, it no longer fully blocks plaque formation by  
430 ICP1 and is susceptible to ICP1-mediated degradation of *V. cholerae*'s chromosomes.

431 As a defense island and phage parasite of ICP1, the *V. cholerae* PLE has become highly  
432 evolved to make use of phage-encoded gene products to drive its anti-phage program  
433 (McKitterick & Seed 2018). Here, we characterize a new ICP1-PLE interaction: PLE hijacks a  
434 non-essential ICP1-encoded SF1B-type helicase to drive PLE replication during infection,  
435 making PLE the first characterized phage satellite that makes use of replication machinery  
436 encoded by its helper phage. In comparison, the well-studied SaPIs make use of their bacterial  
437 host's replication machinery and are able to autonomously replicate in the absence of helper  
438 phage (Úbeda et al. 2008). PLE's unique requirement for the phage-encoded helicase also  
439 underscores the differences between the helper phages that induce these chromosomal islands,  
440 with PLE being induced by a lytic phage that encodes its own replication machinery and SaPIs  
441 being induced by an activated temperate phage that also exploits its host-encoded replication  
442 machinery (Úbeda et al. 2008). The fact that *helA* expression alone is not sufficient to drive  
443 midiPLE replication in the absence of ICP1 infection implicates other ICP1-encoded replication

444 proteins in facilitating PLE replication. Aside from the SF1B-type helicases, the potential role for  
445 ICP1's replication machinery in PLE replication remains to be elucidated. As T4 *dda* has been  
446 observed to have a role in T4 origin initiation during origin-dependent replication (Brister 2008),  
447 we speculate that *helA* has a similar role in facilitating origin firing in PLE by interacting with a  
448 conserved part of the PLE machinery and recruiting a conserved ICP1 replication protein. ICP1  
449 is predicted to encode a DNA polymerase and primase/helicase reminiscent of machinery that  
450 drives the *E. coli* phage T7 replisome (Barth et al. 2019). Further work remains to identify what  
451 roles, if any, these replisome proteins have in PLE mobilization.

452         Despite not being essential, all ICP1 isolates encode an accessory SF1B-type helicase,  
453 as do several marine phages (Figure S3B) (Kauffman et al. 2018). Of note, one of these marine  
454 *Vibrio* phages is also predicted to encode a complete Type 1-F CRISPR-Cas system, which is  
455 of the same type that is encoded by some isolates of ICP1 to target and overcome PLE activity  
456 (Seed et al. 2013; McKitterick et al. 2019), suggesting that ICP1 could be exchanging genetic  
457 material with or could be related to these marine phages infecting non-cholera *Vibrios*. The  
458 fitness costs associated with losing the accessory SF1B-type helicase, as measured by plaque  
459 size, implicate both *helA* and *helB* in maintaining optimal phage fitness, though the precise role  
460 for these accessory helicases in the phage lifecycle remains to be determined. The ease with  
461 which PLE is able to make use of ectopically expressed *helB* compared to the inability of  
462 ectopically expressed *helB* to complement the ICP1<sup>B</sup>  $\Delta$ *helB* replication deficiency suggests that  
463 these helicases play a specialized role in the phage lifecycle that is more complex than for PLE.

464         Due to the variability between ICP1 isolates, we see that PLE has evolved to make use  
465 of not just two unrelated ICP1-encoded helicases, but also of T4 *dda*, the prototypical but  
466 unrelated SF1B helicase. The ability of PLE to replicate using several dissimilar helicases  
467 implicates strong evolutionary pressures for maintenance of PLE replication in response to ICP1  
468 evolution. While *helA* is only one of the seemingly wide variety of ICP1 inputs that contribute to  
469 PLE activity, SaPIs have similarly evolved to overcome variability in helper phage induction

470 cues (Bowring et al. 2017). The apparent promiscuity of the SaPI master repressor allows for  
471 recognition of structurally dissimilar but functionally conserved phage proteins to ensure SaPI  
472 excision, replication and spread, despite their helper phage's attempts to avoid SaPI induction.  
473 It is also imperative for PLE to be able to make use of either one of the ICP1-encoded helicases  
474 to continue PLE propagation through epidemic *V. cholerae* populations, thus selecting for PLE  
475 genes that are able to make use of dissimilar helicases despite the capacity of ICP1 to swap  
476 one helicase for another.

477         The striking spatial separation between the ICP1<sup>A</sup> and ICP1<sup>B</sup> populations that were shed  
478 by cholera patients in Bangladesh during the same epidemic period suggests that slight  
479 variations in the phage strain, such as the difference between *helA* and *helB*, can have large  
480 differences in the makeup of phage populations. Indeed, the ability of ICP1<sup>B</sup>  $\Delta$ *helB* to form  
481 plaques in the presence of PLE (Figure 5B) suggests that ICP1<sup>B</sup> should dominate in the  
482 presence of PLE (+) *V. cholerae*; however, the greater fitness cost for ICP1<sup>B</sup> in the absence of  
483 *helB*, as evidenced by the diminished ability of ICP1<sup>B</sup>  $\Delta$ *helB* to replicate, suggests that the loss  
484 of *helB* in the presence of PLE (+) *V. cholerae* is ultimately detrimental to the phage population.

485         The necessity of excision and replication of PLE during ICP1 infection highlights a  
486 crucial role for mobilization of inducible phage defense systems during phage infection. In order  
487 for inducible defenses to functionally protect a host cell from phage infection, they must be able  
488 to overcome the infecting phage's destruction of the host chromosome. Elements independent  
489 of the host chromosome, such as plasmids, seem to be somewhat protected from degradation  
490 by lytic phages (Keen et al. 2017). It thus stands to reason that the observed high prevalence of  
491 phage defense systems encoded on genomic islands (Makarova et al. 2011) may be in part due  
492 to the ability of genomic islands to mobilize during infection and escape phage-mediated host  
493 takeover, with the potential of horizontal transfer or the ability to escape from a dying host as an  
494 added benefit. Through experimental and *in silico* validation, more phage defense islands have  
495 been identified and characterized, albeit often in a context independent from infection by a

496 native phage. Given the propensity of some phages to degrade their host chromosome during  
497 infection and the need for protective MGEs to escape host takeover, it will be interesting to  
498 further explore if other inducible defense islands mobilize in response to phage infection and are  
499 in fact unrecognized phage satellites.

500

## 501 **ACKNOWLEDGMENTS**

502 This research was funded by the National Institute of Allergy and Infectious Diseases grant  
503 number R01AI127652 (K.D.S.). A.C.M. received support from the Kathleen L. Miller Fellowship  
504 from the Henry Wheeler Center for Emerging and Neglected Diseases. K.D.S. is a Chan  
505 Zuckerberg Biohub Investigator. The authors are especially thankful to icddr,b hospital and  
506 laboratory staff for their support, in particular Shirajum Monira, Fatema-tuz Johura, Marzia  
507 Sultana, Kazi Zillur Rahman, and Monika Sultana. M.A. of icddr,b, thanks the governments of  
508 Bangladesh, Canada, Sweden, and United Kingdom for providing core/unrestricted support. We  
509 also wish to thank members of the Seed Lab for helpful discussions, and Angus Angermeyer,  
510 specifically, for help with the annotation/computational analyses.

## 511 **AUTHOR CONTRIBUTIONS**

512 Conceptualization, A.C.M and K.D.S.; Investigation, A.C.M. and S.G.H.; Resources, M.A.;  
513 Writing – Original Draft, A.C.M. and K.D.S.; Writing – Review & Editing, A.C.M, S.G.H, M.A. and  
514 K.D.S.; Funding Acquisition, A.C.M., M.A. and K.D.S.

## 515 **DECLARATION OF INTERESTS**

516 K.D.S. is a scientific advisor for Nextbiotics, Inc.

517

## 518 **Figures**

519 **Figure 1. ICP1 overcomes excision-deficient PLE through loss of accessory helicase**  
520 **heIA. A**, Schematic of the PLE 1 response to ICP1 infection. Left, ICP1 infects PLE (+) *V.*  
521 *cholerae* and expresses PexA, which physically interacts with PLE 1-encoded integrase (Int) to  
522 direct PLE circularization and excision. Excised PLE 1 replicates to high copy number, inhibits  
523 ICP1 replication, and horizontally transduces to neighboring cells when *V. cholerae* undergoes  
524 PLE 1-mediated accelerated lysis. Right, when ICP1  $\Delta pexA$  infects PLE (+) *V. cholerae*, PLE 1  
525 remains integrated in the host chromosome, and rare mutant phage are able to escape and  
526 form a plaque. **B**, Tenfold dilutions of ICP1 spotted on a PLE 1 and PLE (-) *V. cholerae* lawn  
527 (grey). Zones of killing are shown in black. **C**, Efficiency of plaquing of wild-type (WT) ICP1<sup>A</sup> or  
528 derivatives with the deletions listed on PLE 1 relative to a PLE (-) *V. cholerae* host. Dashed line  
529 indicates limit of detection. **D**, Western blot of endogenously FLAG-tagged HeIA during infection  
530 of PLE (-) *V. cholerae*. **E**, Quantification of change in ICP1 genome copy number following 20  
531 minutes of infection of the listed *V. cholerae* host as detected by qPCR.

532  
533 **Figure 2. ICP1-encoded heIA is necessary for PLE replication. A**, Quantification of change  
534 in PLE 1 copy number following infection by the listed ICP1 strain as measured by qPCR.  
535 Empty vector ( $P_{tac}$ -EV) and *heIA* ( $P_{tac}$ -*heIA*) expression plasmids were induced 20 minutes prior  
536 to phage infection. The dashed line indicates no change in copy number. **B**, Quantification of  
537 change in midiPLE copy number following infection of midiPLE (+) *V. cholerae*  $\Delta lacZ::P_{tac}$ -*repA*  
538 with the listed expression plasmid by the listed ICP1 as measured by qPCR. Ectopic *repA* and  
539 expression plasmids were induced 20 minutes prior to phage infection. **C**, Change in  
540 luminescence of  $P_{orf2}$ -*nanoluc* reporter with the listed expression plasmid 20 minutes after  
541 infection by ICP1<sup>A</sup>  $\Delta heIA$  relative to the change in luminescence following infection by ICP1<sup>A</sup>.

542  
543 **Figure 3. Excision and replication deficient PLE is susceptible to ICP1-mediated**  
544 **chromosomal degradation. A**, Cartoon of miniPLE during ICP1 infection. Top, miniPLE-

545 encoded Int (circle) is directed to excise miniPLE during ICP1 infection by ICP1-encoded PexA  
546 (triangle), leading to a single-copy circularized miniPLE episome. Bottom, catalytically dead  
547 miniPLE<sub>CD</sub> Int (circle with red star) is unable to excise miniPLE during ICP1 infection, potentially  
548 rendering the miniPLE susceptible to phage-mediated chromosomal degradation (pac-man). **B**,  
549 Circularization PCR of the miniPLE indicated from boiled ICP1<sup>A</sup> plaques on the host indicated.  
550 **C**, (Top) Total DNA prepped from equal numbers of miniPLE or miniPLE<sub>CD</sub> cells infected by  
551 ICP1<sup>A</sup> at the listed timepoints and imaged via Southern blot (bottom) with a probe against the  
552 miniPLE *kanR* cassette. **D**, Change in copy number of the miniPLE indicated 30 minutes  
553 following ICP1<sup>A</sup> infection as measured by qPCR.

554

555 **Figure 4. ICP1 encodes one of two accessory helicase alleles.** **A**, Plaque size of listed  
556 phage on PLE (-) *V. cholerae*. \*p<0.01. **B**, Cartoon of ICP1 accessory helicase locus. Grey  
557 arrows indicate gene products shared between the two phages, while the mint arrows indicate  
558 gene products unique to the *helA* locus and turquoise arrows indicate gene products unique to  
559 the *helB* locus. **C**, Map (Vecteezy 2019) of distribution of SF1B-type helicases alleles in ICP1  
560 isolates shed by cholera patients in Bangladesh. Top, map of Bangladesh with Dhaka and  
561 Mathbaria marked. Bottom, agarose gel showing PCR detection of the conserved DNA  
562 polymerase (*gp58*), *helA*, and *helB* in ICP1 isolates from cholera patient stools collected in  
563 Dhaka or Mathbaria. Phage isolates are listed in Table S8.

564

565 **Figure 5. Loss of *helB* permits escape from PLE but leads to a defect in ICP1 fitness.** **A**,  
566 Western blot of endogenously FLAG-tagged *helB* at the listed time points following infection of  
567 PLE (-) *V. cholerae*. **B**, Tenfold dilutions of ICP1 spotted on the listed *V. cholerae* lawns. **C**, Fold  
568 change in ICP1 copy number following 20 minutes of infection of the listed *V. cholerae* host as  
569 measured by qPCR. **D**, Fold change in ICP1 copy number following 20 minutes of infection of  
570 the listed *V. cholerae* host as measured by qPCR. Ectopic expression was induced 20 minutes

571 prior to phage infection. **E**, Plaque size of listed phage on PLE (-) *V. cholerae*. \*\* $p < 0.001$ , *ns* not  
572 significant.

573

574 **Figure 6. PLEs can exploit unrelated phage-encoded SF1B-type helicases for replication.**

575 Replication of PLE 1 (**A,C**) or midiPLE (**B**) 20 minutes following infection of *V. cholerae* with the  
576 listed expression vectors by the listed ICP1<sup>B</sup> variant as measured by qPCR. Vectors were  
577 induced 20 minutes prior to infection. Dashed line indicates no change in copy. **D**, Replication of  
578 the listed PLE in an isogenic *V. cholerae* background 20 minutes following infection by  
579 ICP1<sup>A</sup>  $\Delta helA$ . Ectopic vectors were induced 20 minutes prior to infection. Dashed line indicates  
580 no change in copy. **E**, Replication of PLE 1 20 minutes following infection by the listed phage as  
581 measured by qPCR. Ectopic expression of *dda* from *E. coli* phage T4 was induced 20 minutes  
582 prior to infection. Dashed line indicates no change in copy.

583

584 **Supplementary Figures**

585 **Figure S1. Related to Figure 1. ICP1<sup>A</sup>  $\Delta pexA$   $\Delta helA$  does not accumulate mutations to**  
586 **escape PLE.** Three sets of plaques (a-c) from ICP1  $\Delta pexA$   $\Delta helA$  on PLE 1 *V. cholerae* were  
587 picked and the efficiency of plaquing on PLE 1 relative to PLE (-) *V. cholerae* was tested.

588

589 **Figure S2. Related to Figure 2. Infected PLE 1 *V. cholerae* demonstrate altered lysis**  
590 **kinetics when PLE 1 does not replicate.** **A**, OD<sub>600</sub> of the PLE 1 *V. cholerae* over time after  
591 infection with the listed ICP1. **B**, Cartoon of the PLE 1-encoded nanoluciferase reporter with  
592 nanoluciferase (nL) encoded downstream of PLE 1 *orf2*. Line break in the PLE genome is  
593 shown for simplicity and no other mutations are present.

594

595 **Figure S3. Related to Figure 4. SF1B-type helicases are found in a variety of marine**  
596 **phages.** **A**, Praline alignment (Bawono & Heringa 2014) of ICP1<sup>A</sup> HelA, ICP1<sup>B</sup> HelB, and T4



597 Dda. The Walker A motif used in ATP hydrolysis is indicated by asterisks, and the Duf2493 in  
598 HelB is underlined. **B**, Phylogenetic analysis of SF1B-type helicases, phages used are listed in  
599 Table S7.

600

601 **Figure S4. Related to Figure 6. PLE replication is not altered by ectopic expression of**  
602 ***helA* or *helB*.** Replication of the listed PLE in an isogenic *V. cholerae* background 20 minutes  
603 following infection by ICP1<sup>A</sup>. Ectopic vectors were induced 20 minutes prior to infection. Dashed  
604 line indicates no change in copy.

605

## 606 **STAR Methods**

## 607 **CONTACT FOR REAGENT AND RESOURCE SHARING**

608 Further information and requests for resources and reagents should be directed to and will be  
609 fulfilled by the lead Contact Kimberley Seed ([kseed@berkeley.edu](mailto:kseed@berkeley.edu)).

610

## 611 **EXPERIMENTAL MODEL AND SUBJECT DETAILS**

### 612 **Bacterial Growth Conditions**

613 The bacterial strains and plasmids used in this study are listed in Tables S2 and S5. All bacterial  
614 strains were grown at 37°C in LB with aeration or on LB agar plates. The following antibiotics  
615 were used as necessary: streptomycin (100 µg/mL), spectinomycin (100 µg/mL), kanamycin (75  
616 µg/mL), ampicillin, (*V. cholerae* 50 µg/mL, *E. coli* 100 µg/mL), chloramphenicol (*V. cholerae*  
617 1.25 µg/mL, *E. coli* 25 µg/mL). Ectopic expression constructs in *V. cholerae* were induced 20  
618 minutes prior to ICP1 infection with 1 mM Isopropyl β-D-1-thiogalactopyranoside (IPTG) and 1.5  
619 mM theophylline.

620

621 **Phage Growth Conditions**

622 The phage isolates used in this study are listed in Table S3. Phage were propagated using the  
623 soft agar overly method and high titer stocks were made by polyethylene glycerol precipitation  
624 and stored in sodium chloride-tris-EDTA (STE) buffer (Clokier & Kropinski 2009).

625

626 **Phage isolation from rice water stool**

627 The collection of cholera patient rice water stool (RWS) was approved by the icddr,b  
628 institutional review board. All samples were deidentified and written informed consent was  
629 obtained from adult participants and from the guardians of children. Stool samples were mixed  
630 with glycerol in cryovials, frozen, until being processed at the University of California, Berkeley.  
631 For processing, samples were thawed and grown on thiosulfate-citrate-bile salts-sucrose agar,  
632 or used to inoculate alkaline peptone water (APW) for outgrowth. Liquid APW cultures were  
633 struck out on agar plates and aliquots were frozen with glycerol. Individual colonies selected  
634 from plates were confirmed as *V. cholerae* by PCR. These isolates of *V. cholerae*, in addition to  
635 the PLE (-) laboratory strain, were used to isolate phages directly from the RWS glycerol stocks  
636 and from frozen APW outgrowths. Isolated phages were plaque purified twice after isolation.

637

638 **METHOD DETAILS**

639 **Bacterial and phage cloning conditions**

640 Bacterial mutants were cloned using SOE (splicing by overlap extension) PCR and introduced  
641 by natural transformation (Dalia et al. 2014). Plasmids were constructed using Gibson Assembly  
642 or Golden Gate Assembly. Phage mutants were constructed using CRISPR-Cas engineering as  
643 previously described (Box et al. 2016; McKitterick & Seed 2018). Briefly, an editing template  
644 with the desired deletion was cloned into a plasmid and *V. cholerae* harboring this plasmid was  
645 infected by the ICP1 strain of interest. Ten plaques of the passaged phage were collected and  
646 mutants were selected on *V. cholerae* engineered to encode an inducible Type 1-E CRISPR-

647 Cas system and a plasmid with a spacer targeting the gene of interest. Mutant phages were  
648 verified via Sanger sequencing and purified two times on the targeting host before storing in  
649 STE. Total phage gDNA was prepped with a DNeasy Blood & Tissue Kit (Qiagen).

650

### 651 **Phage plaquing conditions**

652 Spot plates were performed as before (McKitterick & Seed 2018). Briefly, mid-log *V. cholerae*  
653 was added to 0.5% molten LB agar poured on a solid agar plate and allowed to solidify. Ten-fold  
654 dilutions of phage were applied to the surface in 3  $\mu$ L spots and allowed to dry. Plates were  
655 incubated at 37°C. Images are representative of at least two independent experiments. The  
656 efficiency of plaquing (EOP) was calculated by comparing the number of plaques a given phage  
657 forms on PLE (-) *V. cholerae* relative to the number of plaques formed on PLE (+) *V. cholerae*.  
658 Each EOP was calculated in triplicate, and the limit of detection is the point at which the phage  
659 is unable to productively infect the PLE (+) host while still forming plaques on a PLE (-) host.  
660 Plaque size was determined by imaging and quantifying with ImageJ at least 20 plaques each  
661 from 3 independent replicates in 0.5% agar overlay on PLE (-) *V. cholerae*. Significance was  
662 determined through a nonparametric T Test.

663

### 664 **qPCR conditions**

665 Fold change in genome copy was performed as before (O'Hara et al. 2017) with slight  
666 modification. Fold change in ICP1 copy number was measured by growing cells to an OD<sub>600</sub> of  
667 0.3, infected with a multiplicity of infection (MOI) of 0.01, and a sample was boiled for 10  
668 minutes as a starting value. Infected cells were returned to the incubator for 20 minutes, at  
669 which point another sample was taken and boiled. Boiled samples were diluted 1:50 and used  
670 as a template in the qPCR reaction. To measure the fold change in PLE and midiPLE copy  
671 number, cells were grown to an OD<sub>600</sub> = 0.3 and the initial sample was immediately taken prior  
672 to addition of phage at an MOI of 2.5 and boiled for 10 minutes. Samples were taken at 20

673 minutes after infection, boiled for 10 minutes, and diluted 1:1000. Quantification of the fold  
674 change in miniPLE copy was measured during infection with an MOI of 5, with samples taken  
675 immediately prior to infection and 30 minutes after infection and boiled for 10 minutes. Boiled  
676 samples were diluted 1:100 and used as template. Experiments with ectopic expression  
677 constructs were induced at  $OD_{600} = 0.2$  for 20 minutes and then normalized to  $OD_{600} = 0.3$  prior  
678 to infection. All samples were run in biological triplicates and technical duplicates. The template  
679 was mixed with the primers listed in Table S4 and IQ Sybr Green Master Mix (Bio-rad) and run  
680 on a CFX Connect Real-Time PCR Detection System (Bio-rad). Fold change was measured as  
681 the amount of DNA in the sample at 20 or 30 minutes after infection relative to the amount of  
682 DNA in the sample at  $T=0$ . Significance was measured by 2-tailed T Test.

683

#### 684 **Western Blots**

685 PLE (-) *V. cholerae* was grown to an  $OD_{600} = 0.3$  and infected with the endogenously FLAG-  
686 tagged ICP1 listed. At the listed timepoints, 1 mL samples were collected and mixed with equal  
687 volume ice-cold methanol and centrifuged at 13000 rpm for 3 minutes at 4°C. Pellets were  
688 washed with ice-cold PBS, resuspended in 1x Laemmli buffer, and boiled for 10 minutes at  
689 99°C. Total protein was run on a 10% Stain Free TGX SDS-PAGE gel (Bio-rad). Primary  
690 Rabbit- $\alpha$ -FLAG antibodies (Sigma) were used at a dilution of 1:5000 and detected with goat- $\alpha$ -  
691 rabbit-HRP conjugated secondary antibodies at a dilution of 1:5000 (Bio-rad). Clarity Western  
692 ECL Substrate (Bio-rad) was used to develop the blots and a Chemidoc XRS Imaging System  
693 (Bio-rad) was used to image.

694

#### 695 **Lysis kinetics and Nanoluciferase assay**

696 PLE (+) *V. cholerae* cells were grown to an  $OD_{600} = 0.2$  and the listed ectopic expression  
697 constructs were induced for 20 minutes. Cells were then normalized to an  $OD_{600} = 0.3$  and  
698 infected at an MOI of 2.5. For lysis kinetics,  $OD_{600}$  was monitored for 30 minutes. For

699 nanoluciferase, 100  $\mu$ L cells were sampled at T=0 and T=20 minutes after infection and added  
700 to 100  $\mu$ L ice cold methanol. Luminescence was measured in a Spectra Max i3x plate reader  
701 (Molecular Devices) using the Nano-Glo Luciferase Assay System (Promega). Relative  
702 luminescence was calculated by dividing the luminescence detected after infection with the  
703 knockout phage relative to the luminescence detected after infection with the WT phage.

704

#### 705 **PCR conditions**

706 PLE circularization PCRs were performed as described (McKitterick & Seed 2018). Briefly,  
707 plaques on the miniPLE or miniPLE<sub>CD</sub> hosts were picked into 50  $\mu$ L of water and boiled for 10  
708 minutes. Boiled template (2  $\mu$ L) was used with the primers listed in Table S4 to detect miniPLE  
709 circularization. Detection of ICP1 *DNA pol*, *helA*, and *helB* from ICP1 isolates were performed  
710 on 5 – 30 ng prepped gDNA from isolated phage with the primers listed in Table S4. PCRs were  
711 run on 2% agarose gels and visualized with GelGreen.

712

#### 713 **Southern Blots**

714 A probe against miniPLE was created using the DIG-High Prime DNA Labeling and Detection  
715 Started Kit I (Sigma). Cells were grown up to OD<sub>600</sub> = 0.3 with kanamycin and infected with  
716 ICP1<sup>A</sup> at an MOI of 5. At the timepoints indicated, 5 mL of cells were harvested and mixed with  
717 5 mL ice cold methanol. Samples were spun at 7000xg at 4°C for 5 minutes. Pellets were  
718 washed ice cold PBS and spun again. Total DNA was extracted from the pellets with the  
719 DNeasy Blood & Tissue Kit (Qiagen). Equal volumes of samples (between 1.5 and 4.1  $\mu$ g DNA)  
720 were digested overnight with EcoRV-HF and Sall-HF (NEB) and run on a 0.7% agarose gel and  
721 visualized with GelRed. The agarose gel was washed briefly and incubated with 0.25 N HCl for  
722 15 minutes, washed again, denatured in 0.4 M NaOH for 20 minutes, and transferred overnight.  
723 DNA was fixed by baking the blot at 120 °C for 30 minutes, and hybridized with 17 ng/mL

724 miniPLE probe overnight at 42°C. The blot was detected with the DIG-High Prime DNA Labeling  
725 and Detection Started Kit I (Sigma) and CSPD™ Substrate (ThermoScientific) and visualized on  
726 a Chemidoc XRS Imaging System (Bio-rad).

727

## 728 **Computational analyses**

729 Escape ICP1  $\Delta pexA$  phage were isolated from PLE (+) *V. cholerae* and purified twice on the  
730 same host. Total gDNA was prepped as above. NEBNext Ultra II DNA Library Preparation Kit  
731 for Illumina (New England Biolabs) was used to prep genomic DNA and was sequenced by  
732 paired-end sequencing (2 × 150 bp) on an Illumina HiSeq4000 (University of California,  
733 Berkeley QB3 Core Facility). The wild-type phage genome was assembled using SPAdes  
734 (Bankevich et al. 2012) with paired-end reads and default settings. This assembly was used as  
735 the reference sequence for comparison to escape phage sequence reads with breseq  
736 (Deatherage & Barrick 2014) in 'consensus' mode and default settings. Protein alignments were  
737 analyzed using Praline (Bawono & Heringa 2014). HeIA conservation was determined by  
738 analyzing HeIA from 17 phages isolated between 2001 and 2017 (Angermeyer et al. 2018;  
739 McKitterick et al. 2019). Phages that did not have whole genome information were Sanger  
740 sequenced from previously prepped phage gDNA (McKitterick et al. 2019) with the primers  
741 listed in Table S4. Phages included in the phylogenetic analysis were selected from a BLASTP  
742 search of HeIA and HeIB. Each hit was included if it had over 30% identity to either protein  
743 across 90% of the protein. A multiple alignment of helicase amino acid sequences was  
744 generated with MUSCLE v3.8.31 (Edgar 2004) using default settings. The alignment file was  
745 converted to the PHYLIP format with Clustal X v2.0 (Larkin et al. 2007) and a bootstrapped  
746 (n=100) maximum-likelihood phylogenetic tree was solved using PhyML v20120412 (Guindon et  
747 al. 2005) with the following settings: -d aa -s BEST --rand\_start --n\_rand\_starts 100 -o tlr -b  
748 100).

749

750 **Quantification and statistical analysis**

751 Statistical tests used for experiments are listed in the Methods section. Data was analyzed  
752 using Prism GraphPad. For EOPs, qPCR, lysis kinetics, and nanoluciferase assays, error bars  
753 indicate standard deviation of average fold change from three independent biological replicates.  
754 Spot plate, agarose gel, and blot images are representative of at least two independent  
755 experiments.

756

757 **Data and code availability**

758 The data supporting the study are found in the manuscript, supplementary information, or from  
759 the corresponding author upon request.

760

761 **References**

- 762 Angermeyer, A. et al., 2018. Analysis of 19 Highly Conserved *Vibrio cholerae* Bacteriophages  
763 Isolated from Environmental and Patient Sources Over a Twelve-Year Period. *Viruses*,  
764 10(6), p.299.
- 765 Bankevich, A. et al., 2012. SPAdes: A New Genome Assembly Algorithm and Its Applications to  
766 Single-Cell Sequencing. *Journal of Computational Biology*, 19(5), pp.455–477.
- 767 Barth, Z.K. et al., 2019. Genome replication dynamics of a bacteriophage and its satellite reveal  
768 strategies for parasitism and viral restriction. *bioRxiv*. Available at:  
769 <https://www.biorxiv.org/content/10.1101/639039v1>.
- 770 Bawono, P. & Heringa, J., 2014. PRALINE: A Versatile Multiple Sequence Alignment Toolkit.  
771 *Methods Mol Bio*, 1079, pp.245–62.
- 772 Blair, L.P., Tackett, A.J. & Raney, K.D., 2009. Development and evaluation of a structural model  
773 for SF1B helicase dda. *Biochemistry*, 48(11), pp.2321–2329.
- 774 Bondy-Denomy, J. & Davidson, A.R., 2014. When a virus is not a parasite: The beneficial  
775 effects of prophages on bacterial fitness. *Journal of Microbiology*, 52(3), pp.235–242.
- 776 Bowring, J. et al., 2017. Pirating conserved phage mechanisms promotes promiscuous  
777 staphylococcal pathogenicity island transfer. *eLife*, 6, p.e26487.
- 778 Box, A.M. et al., 2016. Functional analysis of bacteriophage immunity through a Type I-E  
779 CRISPR-Cas system in *Vibrio cholerae* and its application in bacteriophage genome  
780 engineering. *Journal of Bacteriology*, 198(3), pp.578–90.
- 781 Brister, J.R., 2008. Origin Activation Requires both Replicative and Accessory Helicases during  
782 T4 Infection. *Journal of Molecular Biology*, 377(5), pp.1304–1313.
- 783 Brüssow, H., Canchaya, C. & Hardt, W.-D., 2004. Phages and the Evolution of Bacterial  
784 Pathogens: from Genomic Rearrangements to Lysogenic Conversion. *Microbiol Mol Biol*  
785 *Rev*, 68(3), pp.560–602.
- 786 Byrd, A.K. & Raney, K.D., 2006. Displacement of a DNA binding protein by Dda helicase.



- 787 *Nucleic Acids Research*, 34(10), pp.3020–3029.
- 788 Byrd, A.K. & Raney, K.D., 2017. Structure and function of Pif1 helicase. *Biochemical Society*  
789 *Transactions*, 45(5), pp.1159–1171.
- 790 Chen, J. et al., 2018. Genome hypermobility by lateral transduction. *Science*, 362(6411),  
791 pp.207–212.
- 792 Clokie, M.R.J. & Kropinski, A.M. eds., 2009. *Bacteriophages*: *methods and protocols*,  
793 Humanan Press.
- 794 Crow, M.S. et al., 2016. Diverse mechanisms evolved by DNA viruses to inhibit early host  
795 defenses. *Critical Reviews in Biochemistry and Molecular Biology*, 51(6), pp.452–481.
- 796 Dalia, A.B., Lazinski, D.W. & Camilli, A., 2014. Identification of a Membrane-Bound  
797 Transcriptional Regulator That Links Chitin and Natural Competence in *Vibrio cholerae*.  
798 *mBio*, 5(1), pp.e01028-13.
- 799 Deatherage, D.E. & Barrick, J., 2014. *Evolved Microbes from Next-Generation Sequencing Data*  
800 *Using breseq, in Engineering and Analyzing Multicellular Systems: Methods and Protocols*  
801 L. Sun & W. Shou, eds., New York, New York: Springer.
- 802 Doron, S. et al., 2018. Systematic discovery of antiphage defense systems in the microbial  
803 pangenome. *Science*, 359(6379), p.eaar4120.
- 804 Dy, R.L. et al., 2014. Remarkable Mechanisms in Microbes to Resist Phage Infections. *Annual*  
805 *Review of Virology*, 1(1), pp.307–331.
- 806 Edgar, R.C., 2004. MUSCLE: multiple sequence alignment with high accuracy and high  
807 throughput. *Nucleic Acids Res*, 32(5), pp.1792–1797.
- 808 Faruque, S.M. et al., 2005. Self-limiting nature of seasonal cholera epidemics: Role of host-  
809 mediated amplification of phage. *Proceedings of the National Academy of Sciences*,  
810 102(17), pp.6119–6124.
- 811 Fillol-Salom, A. et al., 2018. Phage-inducible chromosomal islands are ubiquitous within the  
812 bacterial universe. *ISME Journal*, 12(9), pp.2114–2128.

- 813 Guindon, S. et al., 2005. PHYML Online — a web server for fast maximum likelihood-based  
814 phylogenetic inference. *Nucleic Acids Research*, 33(Web Server issue), pp.W557–W559.
- 815 He, X. et al., 2012. The T4 phage SF1B helicase Dda is structurally optimized to perform DNA  
816 strand separation. *Structure*, 20(7), pp.1189–1200.
- 817 Hercules, K. et al., 1971. Mutants in a Nonessential Gene of Bacteriophage T4 Which Are  
818 Defective in the Degradation of Escherichia coli Deoxyribonucleic Acid. *J Virol*, 7(1), pp.95–  
819 105.
- 820 Hille, F. et al., 2018. The Biology of CRISPR-Cas: Backward and Forward. *Cell*, 172(6),  
821 pp.1239–1259.
- 822 Hinton, D.M. et al., 2005. Transcriptional takeover by  $\sigma$  appropriation: Remodelling of the  $\sigma$ 70  
823 subunit of Escherichia coli RNA polymerase by the bacteriophage T4 activator MotA and  
824 co-activator AsiA. *Microbiology*, 151(6), pp.1729–1740.
- 825 Kauffman, K.M. et al., 2018. Viruses of the Nahant Collection, characterization of 251 marine  
826 Vibrionaceae viruses. *Scientific Data*, 5, p.180114.
- 827 Keen, E.C. et al., 2017. Novel “Superspreader” Bacteriophages Promote Horizontal Gene  
828 Transfer by Transformation. *mBio*, 8(1), pp.e02115-16.
- 829 Koonin, E. V & Krupovic, M., 2015. Evolution of adaptive immunity from transposable elements  
830 combined with innate immune systems. *Nat Rev Genet*, 16(3), pp.184–192.
- 831 Koskella, B. & Brockhurst, M.A., 2014. Bacteria-phage coevolution as a driver of ecological and  
832 evolutionary processes in microbial communities. *FEMS Microbiology Reviews*, 38(5),  
833 pp.916–931.
- 834 Larkin, M.A. et al., 2007. Clustal W and Clustal X version 2.0. *Bioinformatics*, 23(21), pp.2947–  
835 2948.
- 836 Makarova, K.S. et al., 2011. Defense Islands in Bacterial and Archaeal Genomes and Prediction  
837 of Novel Defense Systems. *Journal of Bacteriology*, 193(21), pp.6039–6056.
- 838 Manrique, P., Dills, M. & Young, M.J., 2017. The Human Gut Phage Community and Its

- 839 Implications for Health and Disease. *Viruses*, 9(6), p.E141.
- 840 Martínez-Rubio, R. et al., 2017. Phage-inducible islands in the Gram-positive cocci. *The ISME*  
841 *Journal*, 11(4), pp.1029–1042.
- 842 McKitterick, A.C. et al., 2019. Competition between mobile genetic elements drives optimization  
843 of a phage-encoded CRISPR-Cas system: Insights from a natural arms-race. *Phil. Trans.*  
844 *R. Soc. B*, 374(1772), p.20180089.
- 845 McKitterick, A.C. & Seed, K.D., 2018. Anti-phage islands force their target phage to directly  
846 mediate island excision and spread. *Nature Communications*, 9(1), p.2348.
- 847 O'Hara, B.J. et al., 2017. A highly specific phage defense system is a conserved feature of the  
848 *Vibrio cholerae* mobilome. *PLoS Genetics*, 13(6), p.e1006838.
- 849 Penadés, J.R. et al., 2015. Bacteriophage-mediated spread of bacterial virulence genes.  
850 *Current Opinion in Microbiology*, 23, pp.171–8.
- 851 Penadés, J.R. & Christie, G.E., 2015. The Phage-Inducible Chromosomal Islands: A Family of  
852 Highly Evolved Molecular Parasites. *Annual Review of Virology*, 2(1), pp.181–201.
- 853 Pires, D.P. et al., 2016. Genetically Engineered Phages: a Review of Advances over the Last  
854 Decade. *Microbiology and Molecular Biology Reviews*, 80(3), pp.523–543.
- 855 Ram, G. et al., 2012. Staphylococcal pathogenicity island interference with helper phage  
856 reproduction is a paradigm of molecular parasitism. *Proceedings of the National Academy*  
857 *of Sciences*, 109(40), pp.16300–16305.
- 858 Rivas, H.G., Schmaling, S.K. & Gaglia, M.M., 2016. Shutoff of host gene expression in influenza  
859 A virus and herpesviruses: Similar mechanisms and common themes. *Viruses*, 8(4), p.102.
- 860 Saikrishnan, K. et al., 2009. Mechanistic Basis of 5'-3' Translocation in SF1B Helicases. *Cell*,  
861 137(5), pp.849–859.
- 862 Samson, J.E. et al., 2013. Revenge of the phages: defeating bacterial defences. *Nat Rev*  
863 *Microbiol*, 11(10), pp.675–87.
- 864 Seed, K.D. et al., 2013. A bacteriophage encodes its own CRISPR/Cas adaptive response to

- 865 evade host innate immunity. *Nature*, 494(7438), pp.489–91.
- 866 Seed, K.D. et al., 2011. Evidence of a Dominant Lineage of *Vibrio cholerae*-Specific Lytic  
867 Bacteriophages Shed by Cholera Patients over a 10-Year Period in Dhaka, Bangladesh.  
868 *mBio*, 2(1), pp.e00334-10.
- 869 Seed, K.D. et al., 2014. Evolutionary consequences of intra-patient phage predation on  
870 microbial populations. *eLife*, 3, p.e03497.
- 871 Singleton, M.R. et al., 2004. Crystal structure of RecBCD enzyme reveals a machine for  
872 processing DNA breaks. *Nature*, 432(7014), pp.187–193.
- 873 Tormo-Más, M.A. et al., 2010. Moonlighting bacteriophage proteins derepress staphylococcal  
874 pathogenicity islands. *Nature*, 465(7299), pp.779–782.
- 875 Ubeda, C. et al., 2009. Specificity of staphylococcal phage and SaPI DNA packaging as  
876 revealed by integrase and terminase mutations. *Mol Microbiol.*, 72(1), pp.98–108.
- 877 Ubeda, C. et al., 2008. SaPI mutations affecting replication and transfer and enabling  
878 autonomous replication in the absence of helper phage. *Molecular Microbiology*, 67(3),  
879 pp.493–503.
- 880 Vecteezy, 2019. Vector Bangladesh Map. Available at: <https://www.vecteezy.com/>.
- 881 Warner, H.R. et al., 1970. Isolation of Bacteriophage T4 Mutants Defective in the Ability to  
882 Degrade Host Deoxyribonucleic Acid. *J Virol*, 5(6), pp.700–708.
- 883

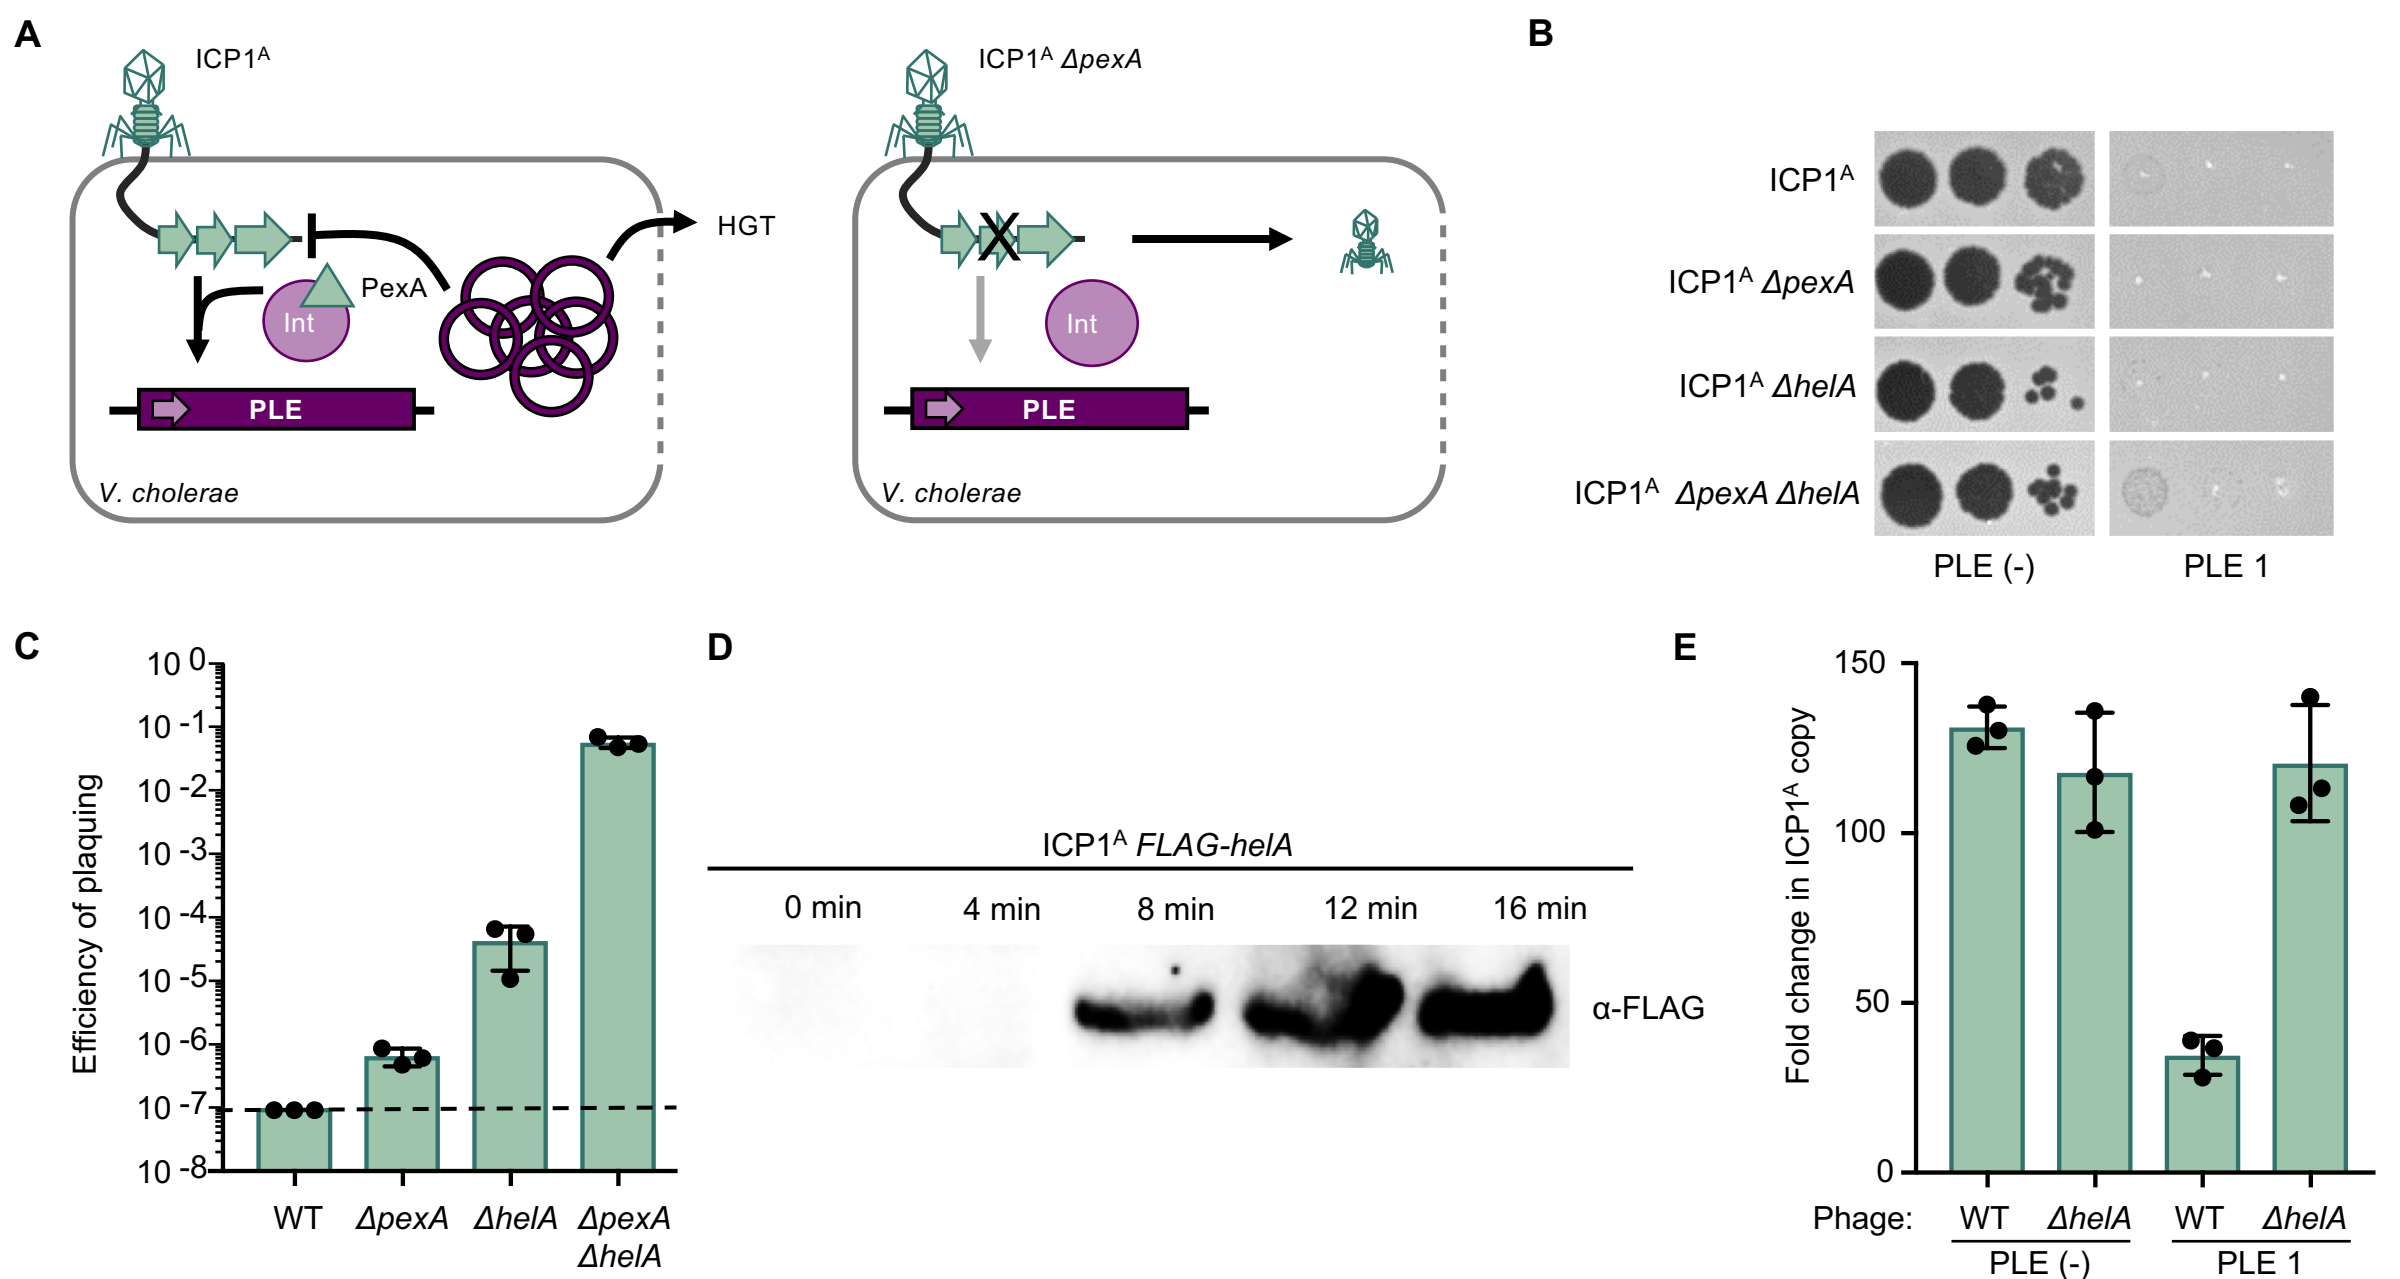

**Figure 1. ICP1 overcomes excision-deficient PLE through loss of accessory helicase *heIA*.** **A**, Schematic of the PLE 1 response to ICP1 infection. Left, ICP1 infects PLE (+) *V. cholerae* and expresses PexA, which physically interacts with PLE 1-encoded integrase (Int) to direct PLE circularization and excision. Excised PLE 1 replicates to high copy number, inhibits ICP1 replication, and horizontally transduces to neighboring cells when *V. cholerae* undergoes PLE 1-mediated accelerated lysis. Right, when ICP1  $\Delta pexA$  infects PLE (+) *V. cholerae*, PLE 1 remains integrated in the host chromosome, and rare mutant phage are able to escape and form a plaque. **B**, Tenfold dilutions of ICP1 spotted on a PLE 1 and PLE (-) *V. cholerae* lawn (grey). Zones of killing are shown in black. **C**, Efficiency of plaquing of wild-type (WT) ICP1<sup>A</sup> or derivatives with the deletions listed on PLE 1 relative to a PLE (-) *V. cholerae* host. Dashed line indicates limit of detection. **D**, Western blot of endogenously FLAG-tagged HeIA during infection of PLE (-) *V. cholerae*. **E**, Quantification of change in ICP1 genome copy number following 20 minutes of infection of the listed *V. cholerae* host as detected by qPCR.

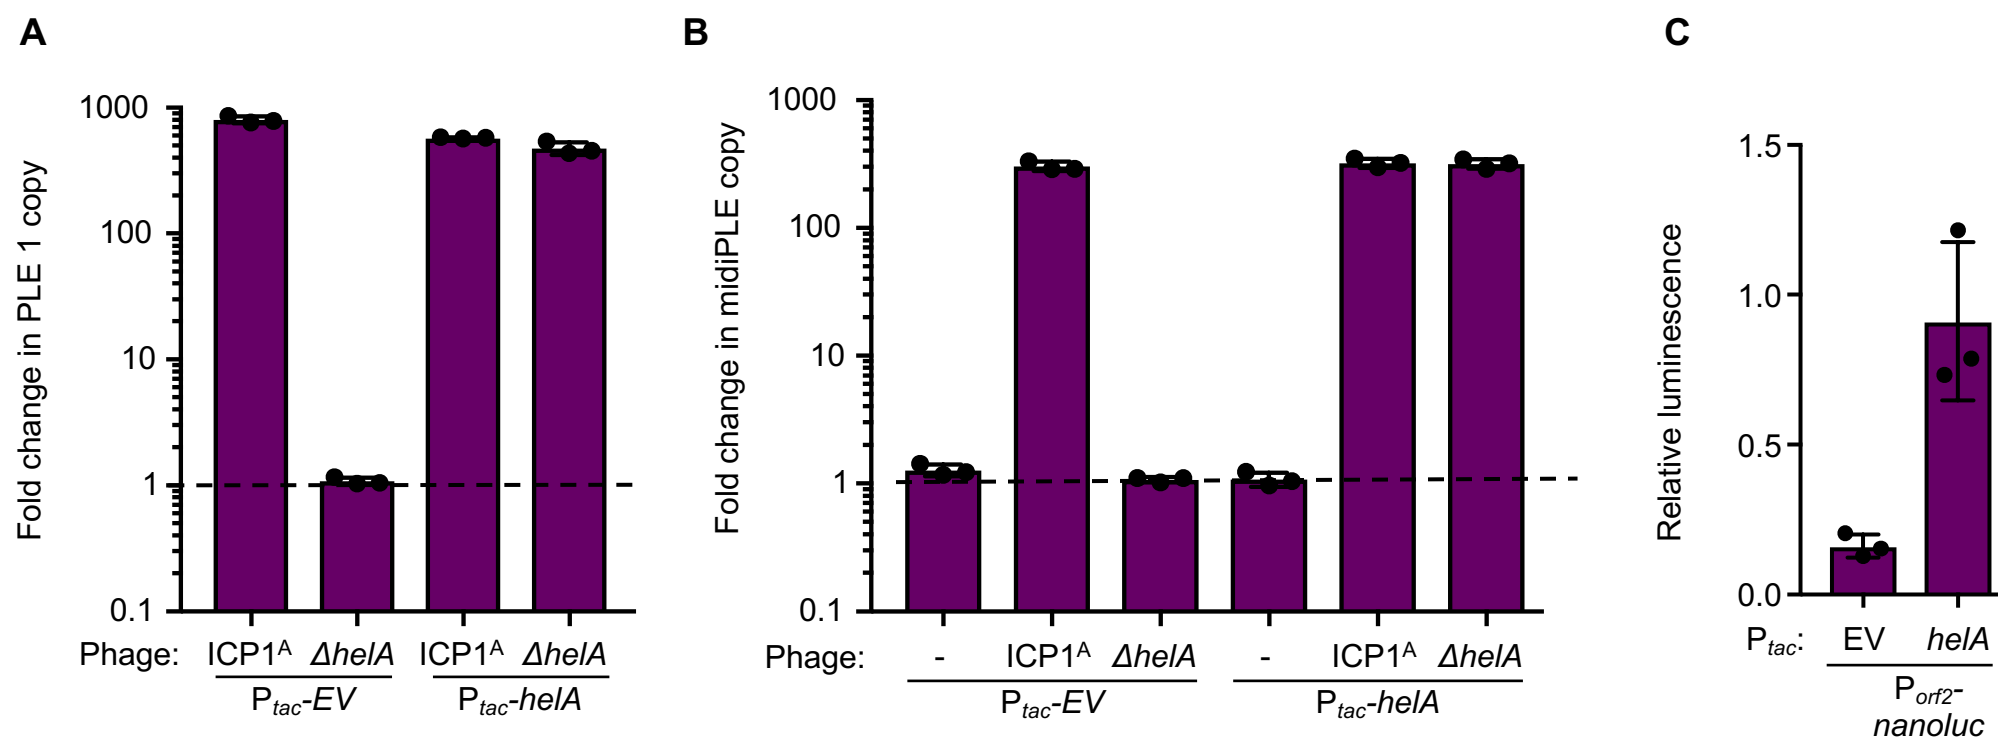

**Figure 2. ICP1-encoded *heIA* is necessary for PLE replication.** **A**, Quantification of change in PLE 1 copy number following infection by the listed ICP1 strain as measured by qPCR. Empty vector (*P<sub>tac</sub>-EV*) and *heIA* (*P<sub>tac</sub>-heIA*) expression plasmids were induced 20 minutes prior to phage infection. The dashed line indicates no change in copy number. **B**, Quantification of change in midiPLE copy number following infection of midiPLE (+) *V. cholerae*  $\Delta lacZ::P_{tac}-repA$  with the listed expression plasmid by the listed ICP1 as measured by qPCR. Ectopic *repA* and expression plasmids were induced 20 minutes prior to phage infection. **C**, Change in luminescence of *P<sub>orf2</sub><sup>-</sup>nanoluc* reporter with the listed expression plasmid 20 minutes after infection by ICP1<sup>A</sup>  $\Delta heIA$  relative to the change in luminescence following infection by ICP1<sup>A</sup>.

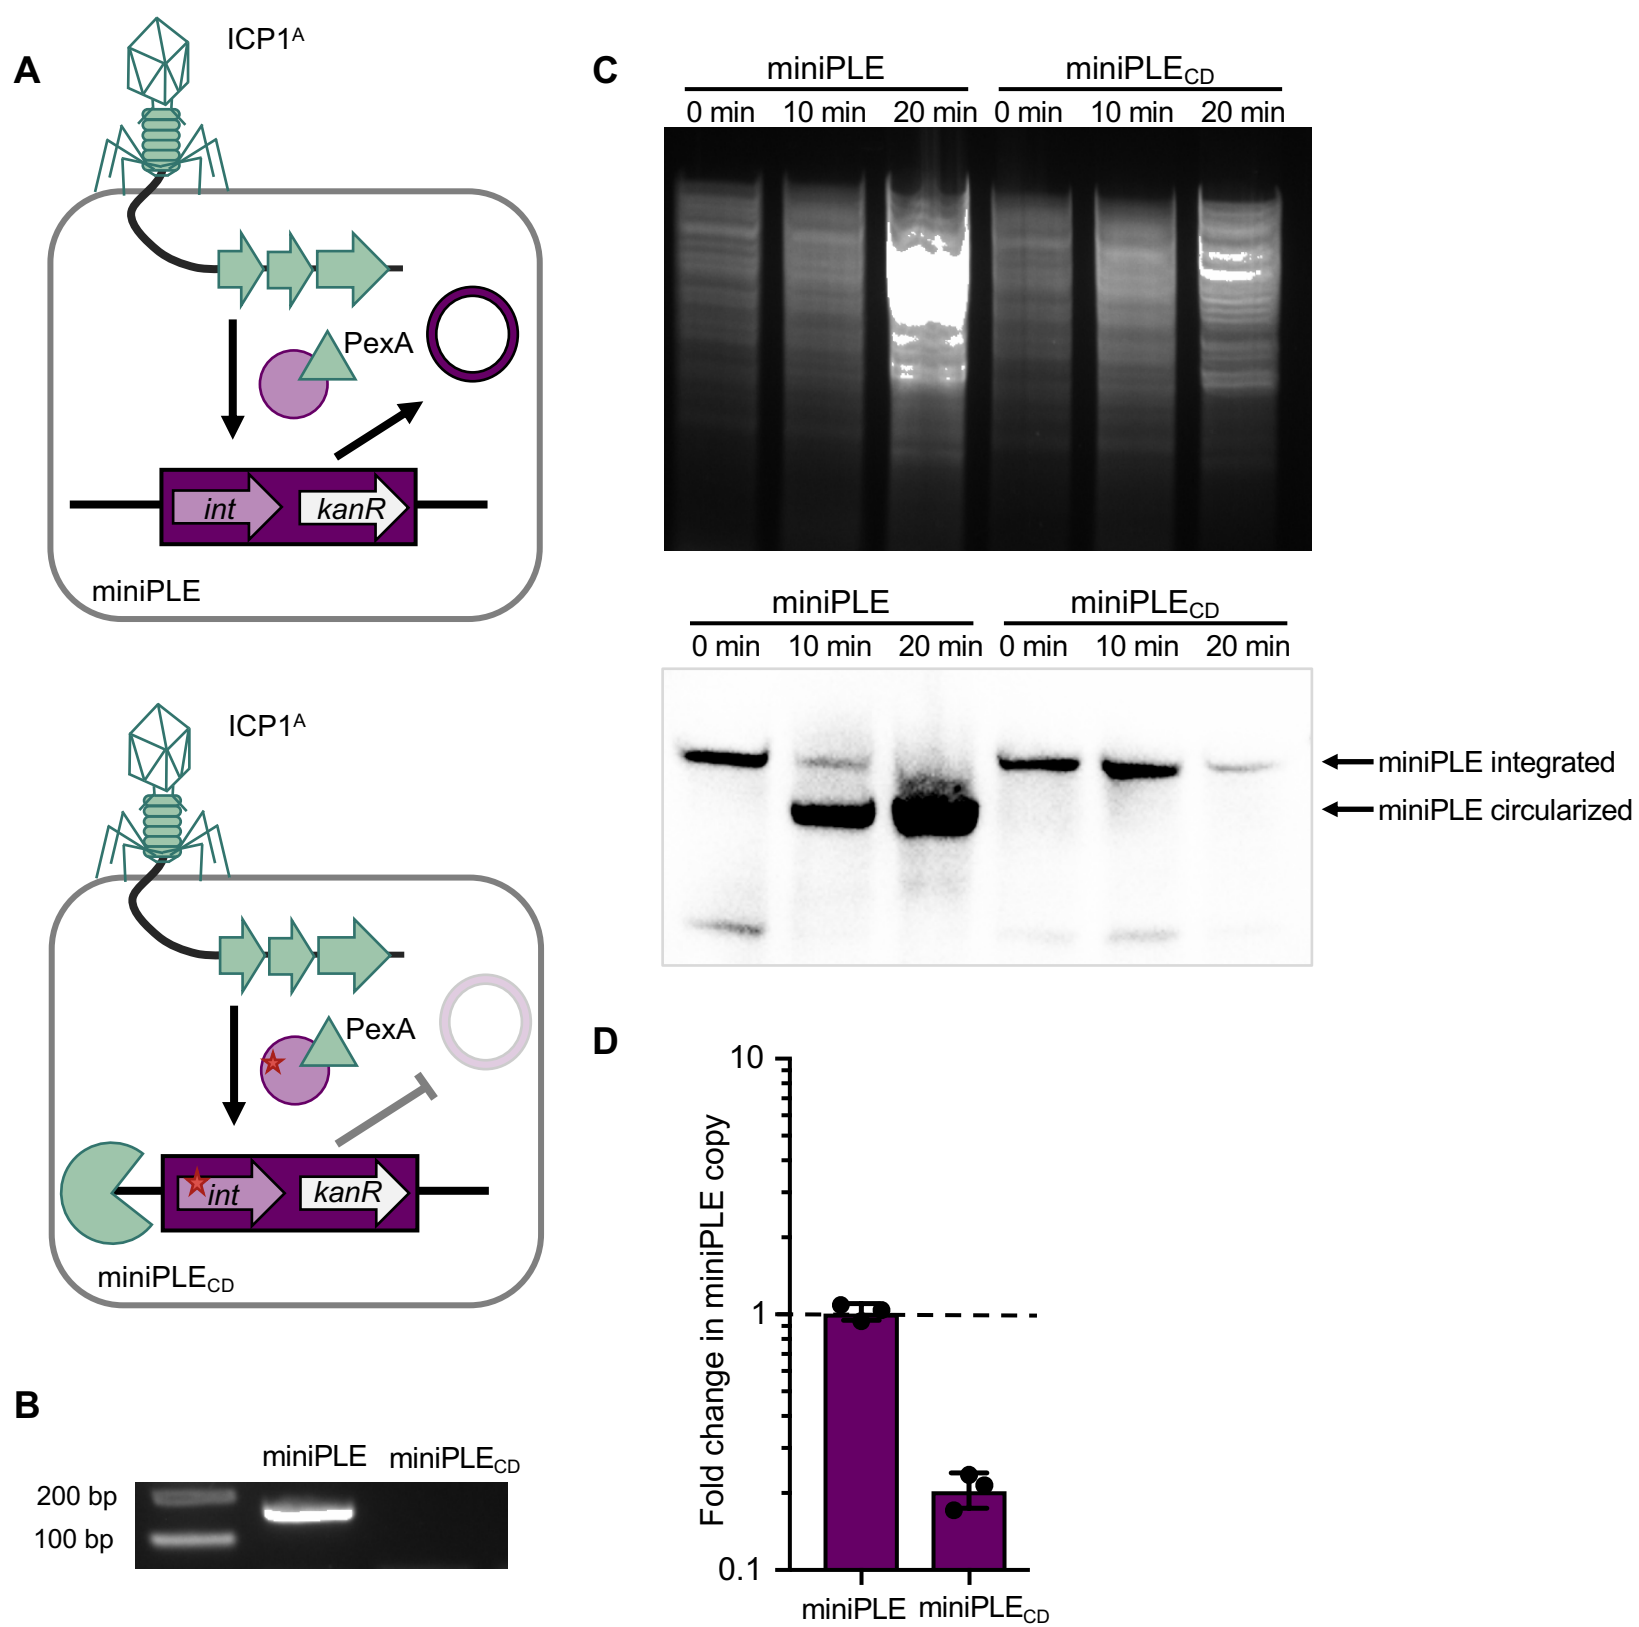

**Figure 3. Excision and replication deficient PLE is susceptible to ICP1-mediated chromosomal degradation.** **A**, Cartoon of miniPLE during ICP1 infection. Top, miniPLE-encoded Int (circle) is directed to excise miniPLE during ICP1 infection by ICP1-encoded PexA (triangle), leading to a single-copy circularized miniPLE episome. Bottom, catalytically dead miniPLE<sub>CD</sub> Int (circle with red star) is unable to excise miniPLE during ICP1 infection, potentially rendering the miniPLE susceptible to phage-mediated chromosomal degradation (pac-man). **B**, Circularization PCR of the miniPLE indicated from boiled ICP1<sup>A</sup> plaques on the host indicated. **C**, (Top) Total DNA prepped from equal numbers of miniPLE or miniPLE<sub>CD</sub> cells infected by ICP1<sup>A</sup> at the listed timepoints and imaged via Southern blot (bottom) with a probe against the miniPLE *kanR* cassette. **D**, Change in copy number of the miniPLE indicated 30 minutes following ICP1<sup>A</sup> infection as measured by qPCR.

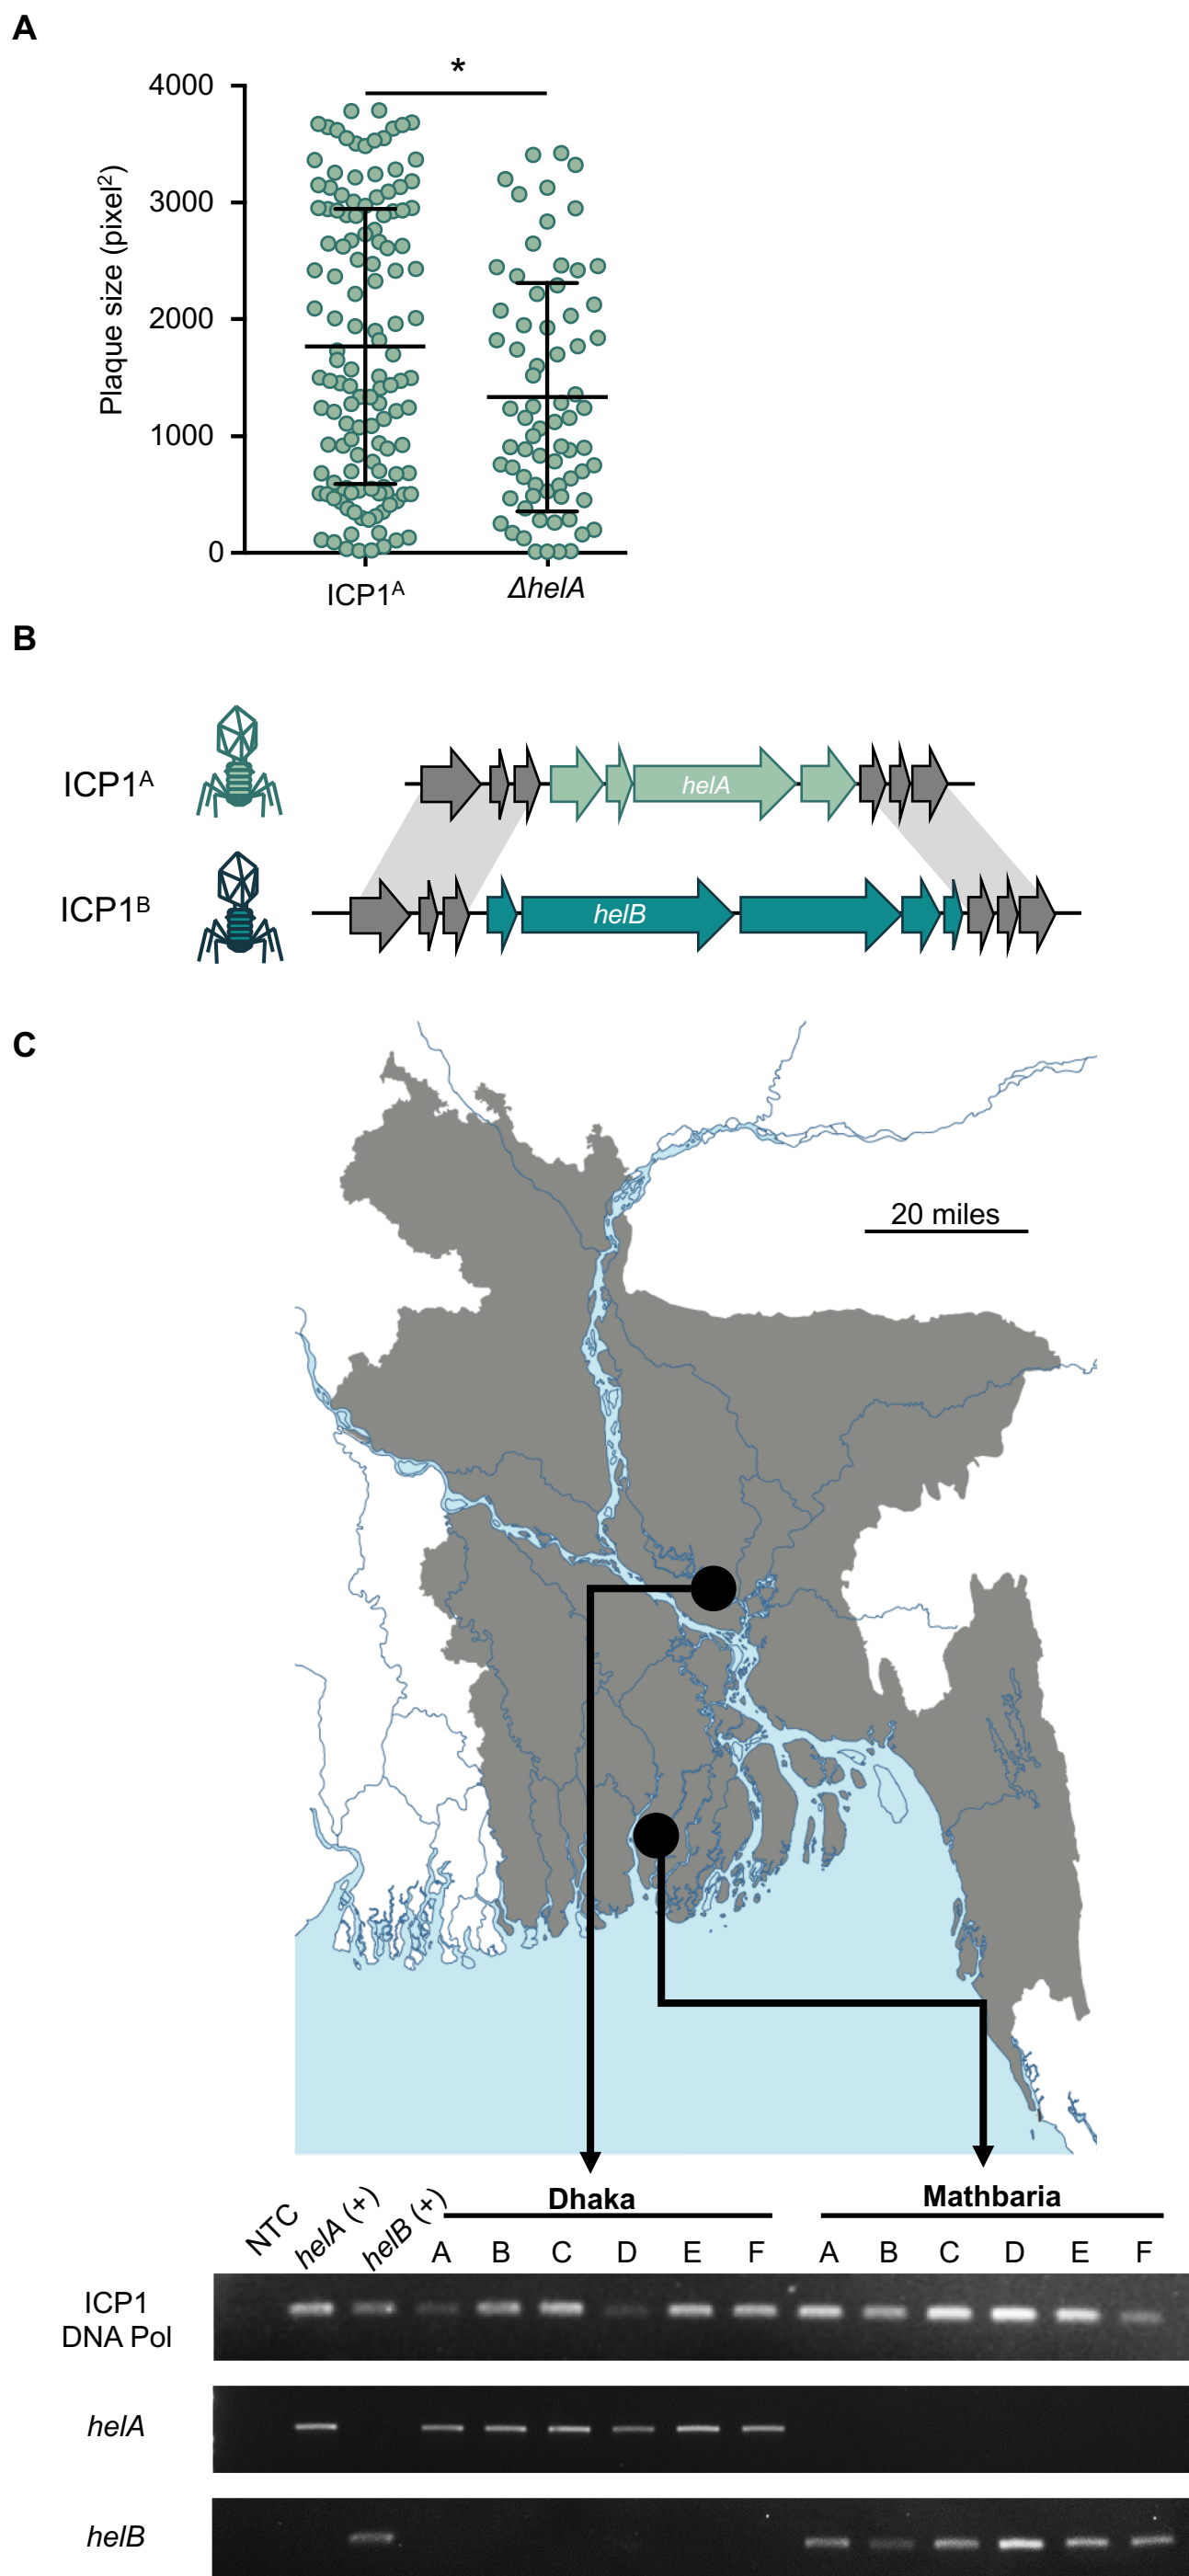

**Figure 4. ICP1 encodes one of two accessory helicase alleles.** **A**, Plaque size of listed phage on PLE (-) *V. cholerae*. \* $p < 0.01$ . **B**, Cartoon of ICP1 accessory helicase locus. Grey arrows indicate gene products shared between the two phages, while the mint arrows indicate gene products unique to the *helA* locus and turquoise arrows indicate gene products unique to the *helB* locus. **C**, Map (Vecteezy 2019) of distribution of SF1B-type helicases alleles in ICP1 isolates shed by cholera patients in Bangladesh. Top, map of Bangladesh with Dhaka and Mathbaria marked. Bottom, agarose gel showing PCR detection of the conserved DNA polymerase (*gp58*), *helA*, and *helB* in ICP1 isolates from cholera patient stools collected in Dhaka or Mathbaria. Phage isolates are listed in Table S8.



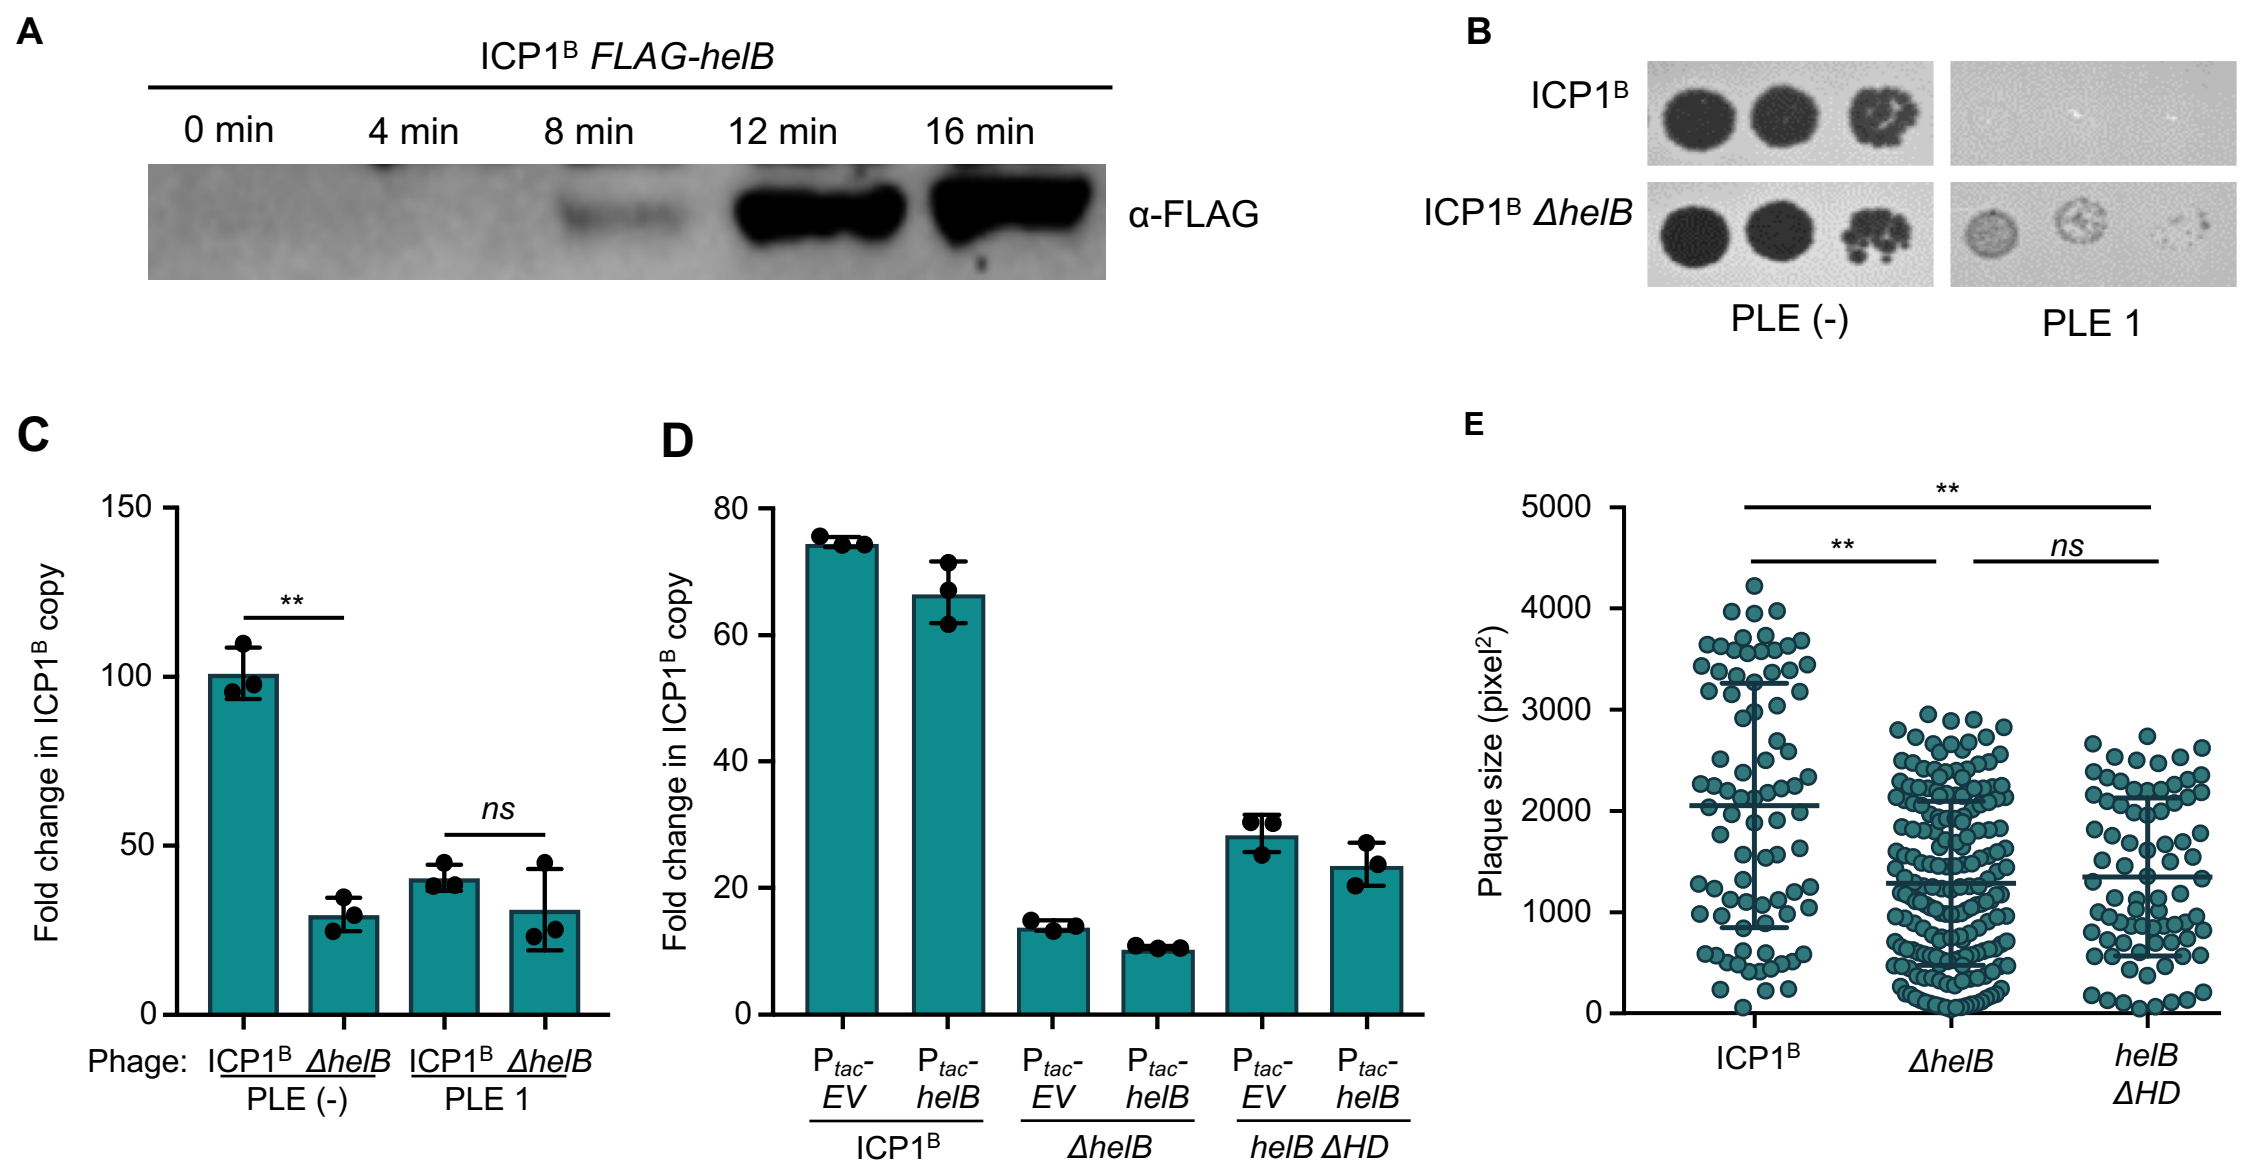

**Figure 5. Loss of *helB* permits escape from PLE but leads to a defect in ICP1 fitness.** **A**, Western blot of endogenously FLAG-tagged *helB* at the listed time points following infection of PLE (-) *V. cholerae*. **B**, Tenfold dilutions of ICP1 spotted on the listed *V. cholerae* lawns. **C**, Fold change in ICP1 copy number following 20 minutes of infection of the listed *V. cholerae* host as measured by qPCR. **D**, Fold change in ICP1 copy number following 20 minutes of infection of the listed *V. cholerae* host as measured by qPCR. Ectopic expression was induced 20 minutes prior to phage infection. **E**, Plaque size of listed phage on PLE (-) *V. cholerae*. \*\*p<0.001, ns not significant.

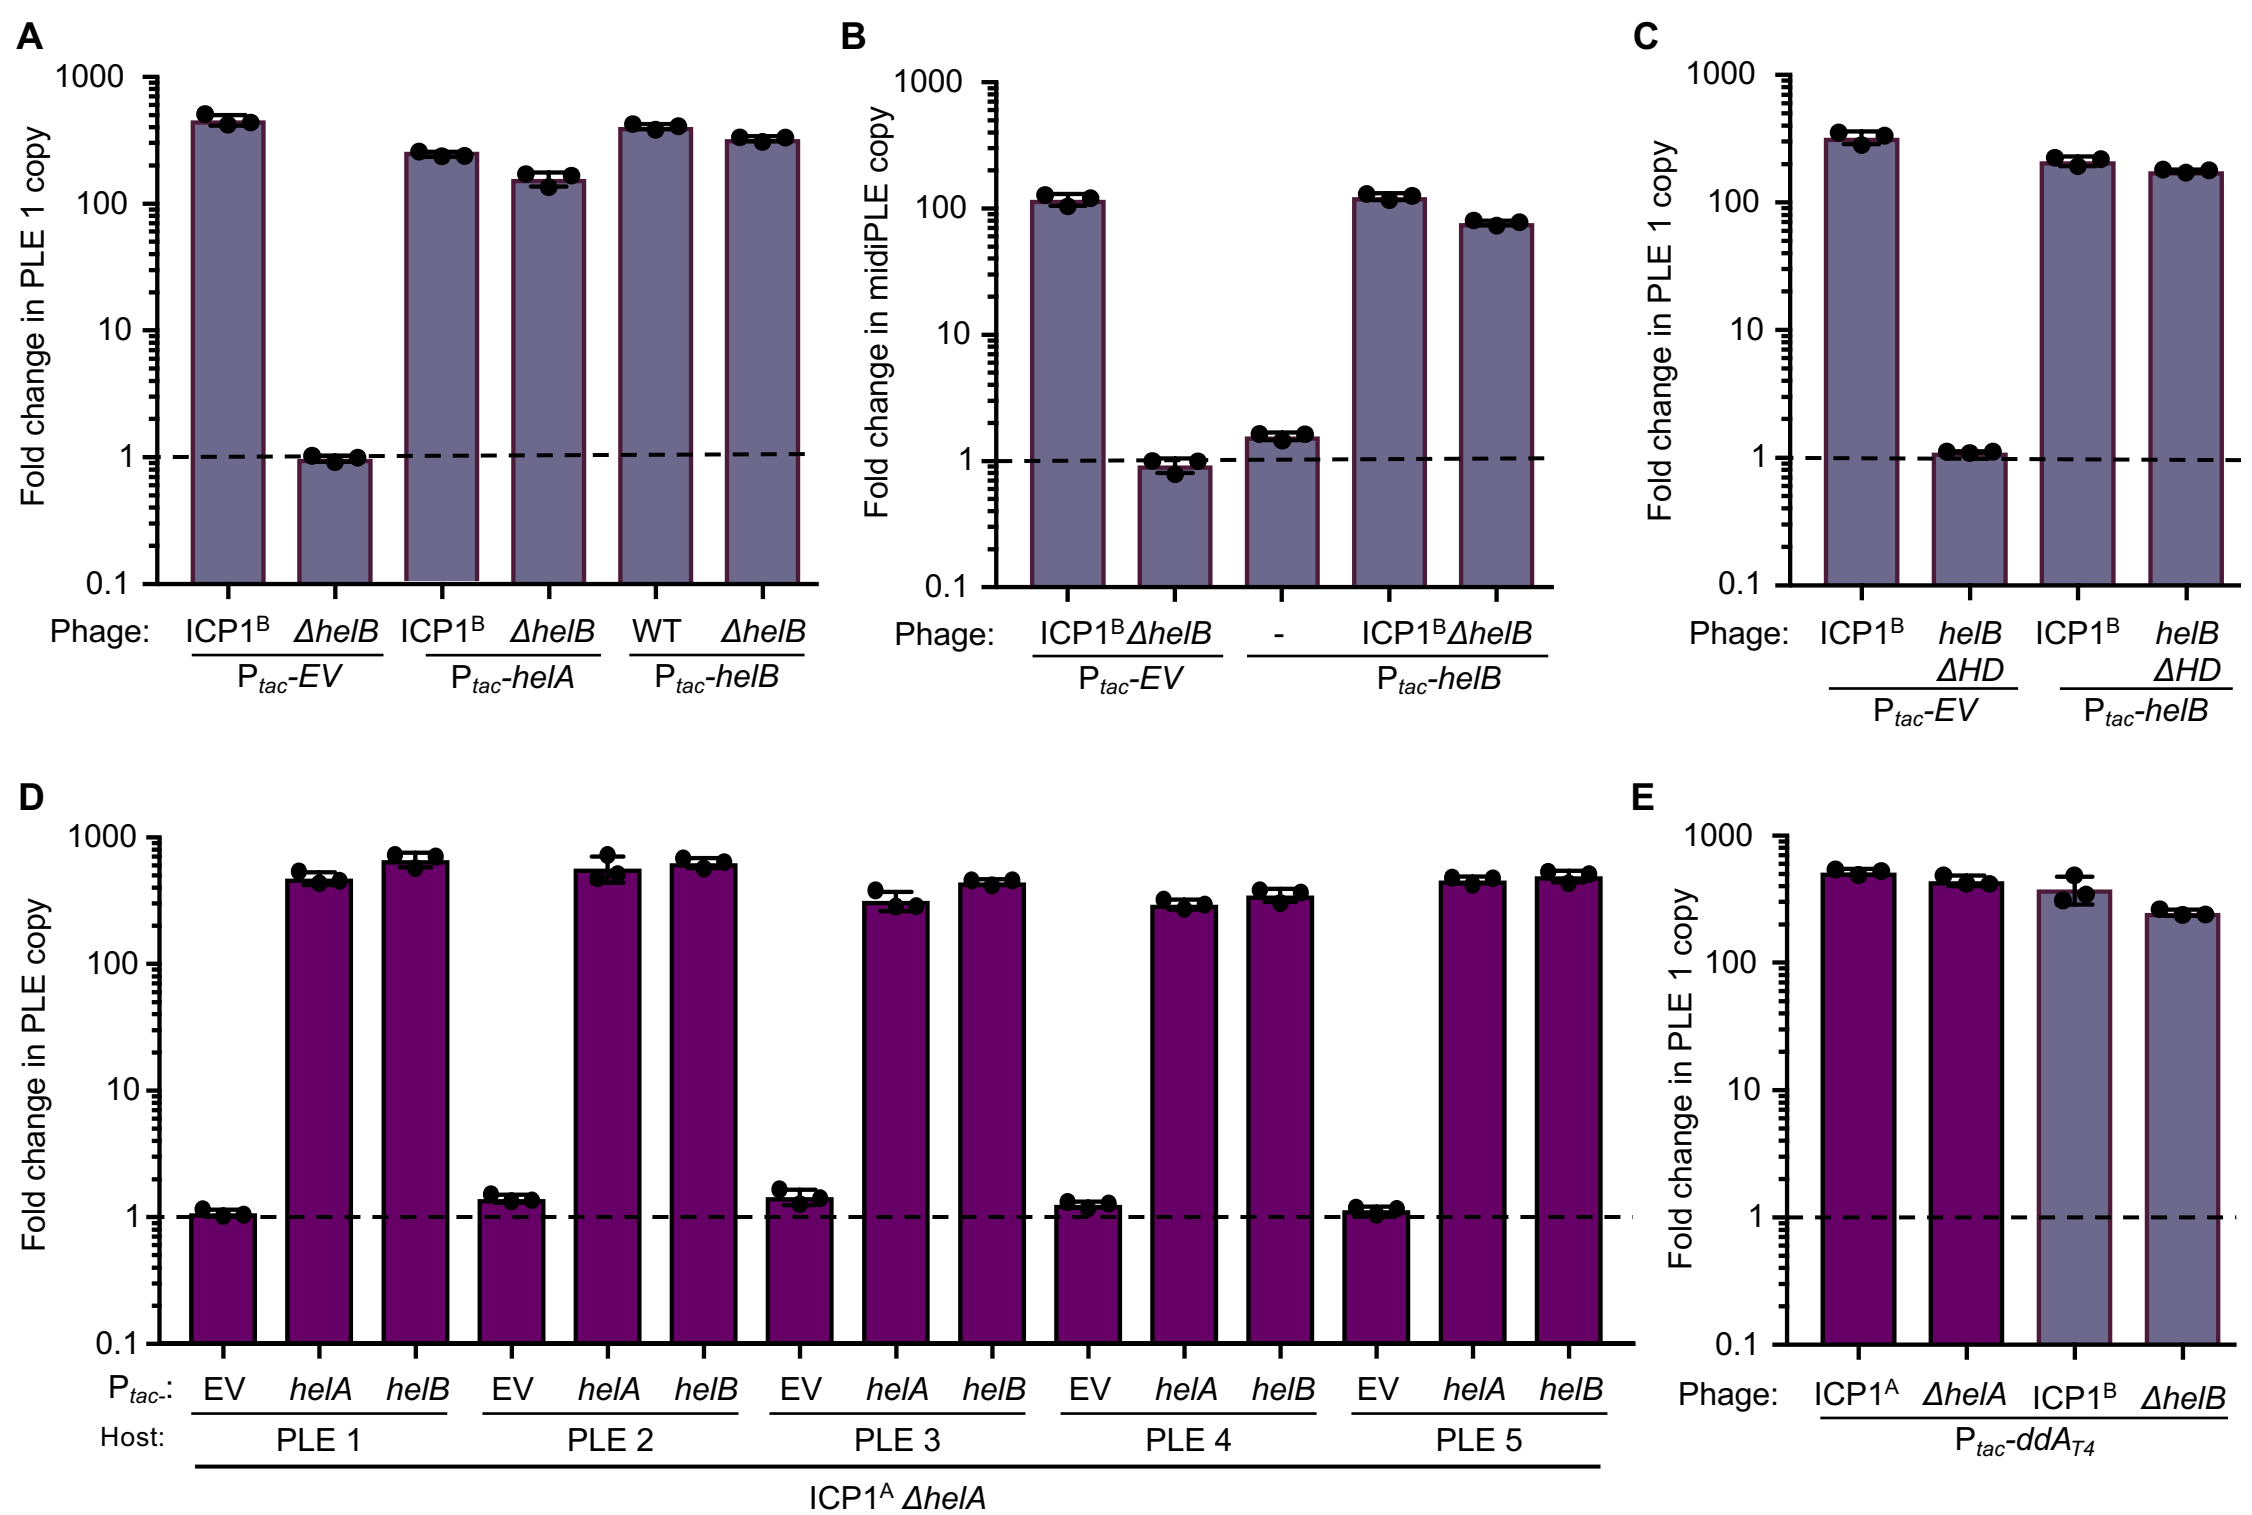

**Figure 6. PLEs can exploit unrelated phage-encoded SF1B-type helicases for replication.** Replication of PLE 1 (A,C) or midiPLE (B) 20 minutes following infection of *V. cholerae* with the listed expression vectors by the listed ICP1<sup>B</sup> variant as measured by qPCR. Vectors were induced 20 minutes prior to infection. Dashed line indicates no change in copy. D, Replication of the listed PLE in an isogenic *V. cholerae* background 20 minutes following infection by ICP1<sup>A</sup>  $\Delta helA$ . Ectopic vectors were induced 20 minutes prior to infection. Dashed line indicates no change in copy. E, Replication of PLE 1 20 minutes following infection by the listed phage as measured by qPCR. Ectopic expression of *dda* from *E. coli* phage T4 was induced 20 minutes prior to infection. Dashed line indicates no change in copy.
